# Supplementary material for: Metagenomic Exploration of Viruses throughout the Indian Ocean
Source: PLoS One. 2012 Oct 17;7(10):e42047. doi: 10.1371/journal.pone.0042047 (PMC3474794; doi:10.1371/journal.pone.0042047)
Supplement: Table S3 — Assembly statistics for Indian Ocean viral metagenomic libraries. (XLSX) [file pone.0042047.s005.xlsx]

## Sheet: Sheet1
Table S3. Assembly statistics for Indian Ocean viral metagenomic libraries.
Sample	Avg. Depth of Coverage across Contigs	Max Contig Length (bp)	N50 (bp)	Total # Contigs	Max # Reads/Contig
Sanger_Frag
GSIOVIR108	7.39	17674	2175	2663	388
GSIOVIR112	7.59	13973	987	3040	233
GSIOVIR117	6.9	12807	1437	2460	108
GSIOVIR122	8.78	27336	1873	3185	625
Sanger_PE
GSIOVIR108	7.43	26400	1362	2714	455
GSIOVIR112	7.68	13551	925	3044	220
GSIOVIR117	7.05	10895	349	2501	88
GSIOVIR122	8.74	26960	1604	3230	815
454_All
GSIOVIR108	21.59	19188	650	34858	6923
GSIOVIR112	20.32	27794	1730	41666	1785
GSIOVIR117	20.56	34824	190	70713	2192
GSIOVIR122	23.35	40022	845	26342	4047
454_Sub
GSIOVIR108a	12.08 ± 0.11	18,814 ± 3,622	1,163 ± 702	4,501 ± 74	1,849 ± 478
GSIOVIR112b	11.05 ± 0.11	7,416 ± 1,921	1,319 ± 840	4,682 ± 51	290 ± 14
GSIOVIR117c	10.37 ± 0.08	14,497 ± 3,254	769 ± 376	4,087 ± 75	591 ± 148
GSIOVIR122c	14.05 ± 0.09	16,007 ± 2,525	695 ± 459	3,757 ± 38	1,401 ± 396
a = 9 subsamples; b = 8 subsamples; c = 10 subsamples
Standard deviations are reported for all subsampled data.
