# Supplementary material for: Metagenomic Exploration of Viruses throughout the Indian Ocean
Source: PLoS One. 2012 Oct 17;7(10):e42047. doi: 10.1371/journal.pone.0042047 (PMC3474794; doi:10.1371/journal.pone.0042047)
Supplement: Table S4 — Top five most abundant cyanophage homologs based on taxonomic assignments. (XLSX) [file pone.0042047.s006.xlsx]

## Sheet: Sheet1
Table S4. Top five most abundant cyanophage homologs based on taxonomic assignments.
Cyanophage	LF (APIS)	VF (APIS)	VF (BLAST)
Prochlorococcus phage P-SSM2	0.442	0.184	0.177
Synechococcus phage S-PM2	0.096	0.04	0.051
Prochlorococcus phage P-SSM4	0.089	0.076	0.078
Prochlorococcus phage P-SSP7	0.031	0.164	0.093
Synechococcus phage syn group	0.042	0.041	0.067
