# Supplementary material for: Metagenomic Exploration of Viruses throughout the Indian Ocean
Source: PLoS One. 2012 Oct 17;7(10):e42047. doi: 10.1371/journal.pone.0042047 (PMC3474794; doi:10.1371/journal.pone.0042047)
Supplement: Table S5 — Functional characterization of VF and LF viral sequences by KEGG category. (XLSX) [file pone.0042047.s007.xlsx]

## Sheet: Sheet1
Table S5. Functional characterization of VF and LF viral sequences by KEGG category.
Functional Category	% VF Clusters	% VF Proteins		% LF Clusters	% LF Proteins
Level 1
Cellular processes	0.001	0.0004		0.0022	0.0004
Cellular processes and signaling	0.0038	0.0038		0.0108	0.004
Environ. info. processing	0.0039	0.0051		0.0104	0.0076
Genetic info. Processing	0.0142	0.0448		0.0784	0.0887
Metabolism	0.0159	0.0352		0.1119	0.1002
Virus structure	0.0018	0.0163		0.019	0.1923
Poorly characterized	0.0053	0.0245		0.019	0.0483
Uncharacterized	0.9258	0.8002		0.5545	0.3747
Unspecific	0.0131	0.0348		0.0832	0.084
Level 2 - Cellular processes and signaling
Cell division	4e-05	2e-05		0.00037	1e-05
Cell motility and secretion	0.00011	0.0001		0.00037	1e-05
Electron transfer carriers	3e-05	0		0	0
Inorganic idon transport and metabolism	0.00045	0.00017		0.00112	8e-05
Membrane and intracellular structural molecule	0.00074	0.00098		0.00336	0.0006
Other ion-coupled transporters	0.001	0.00107		0.00186	0.00019
Other transporters	0.0002	0.00012		0.00075	2e-05
Pores ion channels	0.00056	0.00067		0.00186	0.0004
Signal transduction mechanisms	0.00055	0.00065		0.00112	0.00269
Sporulation	0.00013	5e-05		0	0
Level 2 - Cellular processes
Cell communication	8e-05	2e-05		0	0
Cell growth and death	1e-05	0		0	0
Cell motility	0.00089	0.00033		0.00149	8e-05
Transport and catabolism	5e-05	5e-05		0.00075	0.00031
Level 2 - Env. info. processing
Membrane transport	0.00271	0.00366		0.0082	0.00212
Signal transduction mechanisms	0.00056	0.00119		0.00149	0.00533
Signaling molecules and interaction	0.00063	0.00028		0.00075	0.00017
Level 2 - Genetic info. processing
Folding, sorting and degredation	0.00165	0.00147		0.00597	0.0026
Others	0.0002	0.00051		0.00075	0.0003
Protein folding and assoc. processing	0.00061	0.00072		0.0041	0.00364
Replication and repair	0.00439	0.01634		0.02685	0.04182
Replication, recomb. and repair proteins	0.00199	0.02114		0.01491	0.03478
Restriction enzyme	0.00023	0.0004		0.00112	7e-05
Transcription	0.00193	0.00097		0.00261	0.00089
Transcription related proteins	0.00015	0.00149		0.00261	0.00177
Translation	0.00217	0.00111		0.01193	0.00158
Translation related proteins	0.00084	0.00069		0.00746	0.00126
Level 2 - Metabolism
Amino acid metabolism	0.0022	0.00407		0.01641	0.00513
Biosyn. and biodeg. of secondary metabolites	6e-05	1e-05		0.00037	4e-05
Biosyn. of polyketides and nonribosomal peptides	3e-05	1e-05		0	0
Biosyn. of secondary metabolites	0.00032	0.00025		0.00447	0.00125
Carbohydrate metabolism	0.00264	0.00471		0.01603	0.02166
Energy metabolism	0.00223	0.0038		0.00932	0.0151
Enzyme families	0.00128	0.0069		0.01193	0.01692
Glycan biosyn. and metabolism	0.00137	0.00171		0.01044	0.01133
Lipid metabolism	0.00101	0.00093		0.00671	0.0014
Metabolsim of cofactors and vitamins	0.00206	0.00188		0.01417	0.00553
Metabolism of other amino acids	0.00031	0.00037		0.00261	0.00043
Nucleotide metabolism	0.00112	0.00789		0.00932	0.01142
Others	0.00092	0.00255		0.00858	0.0099
Xenobiotics biodeg. and metabolism	0.00034	0.00012		0.00149	5e-05
Level 3 - Energy metabolism
Carbon fixation in PS* organisms	3e-05	0		0	0
Methan metabolism	6e-05	1e-05		0	0
Nitrogen metabolism	0.00034	0.00045		0.00126	4e-05
Oxidative phosphorylation	0.0007	0.00077		0.00377	0.00046
PS and related proteins	0.00104	0.00122		0.00503	0.00049
Sulfur metabolism	9e-05	2e-05		0	0
Unclassified	0.00066	0.00134		0.00335	0.00366
* PS = photosynthetic or photosynthesis.
