# Supplementary material for: Metagenomic Exploration of Viruses throughout the Indian Ocean
Source: PLoS One. 2012 Oct 17;7(10):e42047. doi: 10.1371/journal.pone.0042047 (PMC3474794; doi:10.1371/journal.pone.0042047)
Supplement: Table S7 — Viral photosystem genes present in the Indian Ocean metagenomic data. (XLSX) [file pone.0042047.s009.xlsx]

## Sheet: Sheet1
Table S7. Viral photosystem genes present in the Indian Ocean metagenomic data.
Gene	Photosystem	Total Homologs	%VF (#)	%LF (#)
psbA	II	3757	74.3 (2792)	25.7 (965)
psbD	II	3120	71.9 (2243)	28.1 (877)
psaA	II	60	98.3 (59)	1.7 (1)
psaB	I	52	92.3 (48)	7.7 (4)
psaC	I	0	NA	NA
psaD	I	26	96.2 (25)	3.8 (1)
psaE	I	21	100 (21)	0
psaK	I	12	100 (12)	0
psaF	I	195	95.4 (186)	4.6 (9)
psaJ	I	5	100 (5)	0
