# Supplementary material for: Metagenomic Exploration of Viruses throughout the Indian Ocean
Source: PLoS One. 2012 Oct 17;7(10):e42047. doi: 10.1371/journal.pone.0042047 (PMC3474794; doi:10.1371/journal.pone.0042047)
Supplement: Table S8 — GOS Bacterial Scaffold Taxonomic Assignments based on MGTAXA. (XLSX) [file pone.0042047.s010.xlsx]

## Sheet: Sheet1
Table S8. GOS Bacterial Scaffold Taxonomic Assignments based on MGTAXA.
	# Bacterial Scaffolds Assigned	Scaffold Length (bp)	Average Scaffold Length (bp)
Taxa - Genus
SAR86 cluster	119	16504885	138697
Candidatus Pelagibacter	87	10475006	120402
Prochlorococcus	38	4916497	129382
Rhodobacterales bacterium HTCC2255	33	5264191	159521
SAR11 cluster	33	4440749	134568
Shewanella	33	3767466	114166
Betaproteobacterium KB13	24	2652948	110540
Burkholderia	15	1777016	118468
Acaryochloris	10	1556804	155680
Bermanella	7	1067837	152548
Metallosphaera	7	1070246	152892
Neorickettsia	7	1298449	185493
Phyllobacteriaceae	7	1162829	166118
Actinomycetales	6	1119838	186640
Rhodobacteraceae bacterium HTCC2083	6	924528	154088
Thermobaculum	6	767684	127947
Coraliomargarita	5	1254211	250842
Flavobacteriaceae	5	494744	98949
Synechococcus	5	2136927	427385
Syntrophaceae	5	676906	135381
Corynebacterium	4	526307	131577
Oceanobacillus	4	547761	136940
Thalassobium	4	514174	128544
Vibrio	4	496645	124161
unclassified Gammaproteobacteria (misc.)	4	414671	103668
Aeromonas	3	280043	93348
Bacilli	3	466732	155577
Paenibacillus	3	420845	140282
Roseobacter	3	309955	103318
Anaerobaculum	2	198034	99017
Firmicutes	2	214706	107353
Propionibacterium	2	486156	243078
Algoriphagus	1	82177	82177
Alphaproteobacteria	1	146849	146849
Bacteroidetes/Chlorobi group	1	149296	149296
Burkholderiaceae	1	147424	147424
Burkholderiales	1	83792	83792
Candidatus Puniceispirillum	1	131867	131867
Chlamydiae	1	114860	114860
Desulfitobacterium	1	103074	103074
Flavobacteria	1	92929	92929
Gammaproteobacteria	1	177624	177624
Hirschia	1	82906	82906
Legionella	1	87044	87044
Legionellaceae	1	81265	81265
Maribacter	1	156485	156485
Mycobacterium	1	194248	194248
Natranaerobius	1	164980	164980
Nitrosococcus	1	124615	124615
Nitrospira	1	83634	83634
Oceanospirillaceae	1	81723	81723
Polaribacter	1	98339	98339
Polynucleobacter	1	95748	95748
Prochlorales	1	126290	126290
Alphaproteobacterium HIMB114	1	83702	83702
