# Supplementary material for: Metagenomic Exploration of Viruses throughout the Indian Ocean
Source: PLoS One. 2012 Oct 17;7(10):e42047. doi: 10.1371/journal.pone.0042047 (PMC3474794; doi:10.1371/journal.pone.0042047)
Supplement: Table S9 — Re-distribution of viral contigs to bacterial taxa from direct to transitive assignments. (XLSX) [file pone.0042047.s011.xlsx]

## Sheet: Sheet1
Table S9. Re-distribution of viral contigs to bacterial taxa from direct to transitive assignments.
Taxa Direct	Taxa Transitive	# Viral Contigs
Cellulophaga	SAR86 cluster	9
Clostridium	SAR86 cluster	7
Coraliomargarita	Thermobaculum	5
Staphylococcus	SAR86 cluster	5
Lactobacillus	SAR86 cluster	4
Prevotella	Bermanella	4
SAR86 cluster	SAR86 cluster	4
Synechococcus	Acaryochloris	4
Synechococcus	Neorickettsia	4
Atopobium	Neorickettsia	3
Clostridium	Candidatus Pelagibacter	3
Coprobacillus	SAR86 cluster	3
Francisella	SAR86 cluster	3
Prochlorococcus	Gammaproteobacteria	3
Prochlorococcus	Thermobaculum	3
Rhodobacterales bacterium HTCC2255	SAR86 cluster	3
Streptococcus	SAR86 cluster	3
Thermodesulfobiaceae	Neorickettsia	3
Acaryochloris	Neorickettsia	2
Acinetobacter	Rhodobacterales bacterium HTCC2255	2
Anaplasma	Vibrio	2
Atopobium	Acaryochloris	2
Candidatus Liberibacter	Prochlorococcus	2
Clostridia	Rhodobacterales bacterium HTCC2255	2
Corynebacterium	Thermobaculum	2
Francisella	Candidatus Pelagibacter	2
Neorickettsia	Acaryochloris	2
Prevotella	Neorickettsia	2
Prevotellaceae	Neorickettsia	2
Prochlorococcus	Acaryochloris	2
Prochlorococcus	Coraliomargarita	2
Prochlorococcus	Vibrio	2
Solobacterium	Flavobacteriaceae	2
Synechococcus	Gammaproteobacteria	2
Terriglobus	Corynebacterium	2
Thermodesulfobiaceae	Acaryochloris	2
Vibrio	Vibrio	2
unclassified Campylobacterales	SAR86 cluster	2
unclassified Gammaproteobacteria (misc.)	Nitrosococcus	2
Acidovorax	Gammaproteobacteria	1
Actinobacillus	Vibrio	1
Albidiferax	Coraliomargarita	1
Anaplasma	Acaryochloris	1
Anaplasma	Metallosphaera	1
Archaeoglobus	Metallosphaera	1
Arthrobacter	Synechococcus	1
Atopobium	Bermanella	1
Atopobium	Thermobaculum	1
Atopobium	Vibrio	1
Bacilli	Natranaerobius	1
Bacilli	Neorickettsia	1
Bacteroides	Chlamydiae	1
Bacteroidetes/Chlorobi group	Bermanella	1
Candidatus Liberibacter	Oceanobacillus	1
Candidatus Pelagibacter	SAR86 cluster	1
Chlamydophila	Rhodobacterales bacterium HTCC2255	1
Clostridium	Prochlorococcus	1
Coprobacillus	SAR11 cluster	1
Coraliomargarita	Acaryochloris	1
Coraliomargarita	Bermanella	1
Coraliomargarita	Coraliomargarita	1
Coraliomargarita	Corynebacterium	1
Coraliomargarita	Neorickettsia	1
Coraliomargarita	Nitrosococcus	1
Coraliomargarita	Vibrio	1
Corynebacterium	Acaryochloris	1
Croceibacter	Candidatus Pelagibacter	1
Croceibacter	SAR86 cluster	1
Desulfovibrio	Nitrosococcus	1
Fibrobacteres/Acidobacteria group	Gammaproteobacteria	1
Firmicutes	Acaryochloris	1
Flavobacteria	Flavobacteriaceae	1
Idiomarina	Acaryochloris	1
Idiomarina	Shewanella	1
Jonesia	Coraliomargarita	1
Kangiella	Vibrio	1
Lactobacillus	Bermanella	1
Lactobacillus	Prochlorococcus	1
Macrococcus	Natranaerobius	1
Neorickettsia	Neorickettsia	1
Neorickettsia	SAR86 cluster	1
Neorickettsia	Vibrio	1
OM60 clade	Acaryochloris	1
OM60 clade	Gammaproteobacteria	1
Oceanobacillus	Betaproteobacterium KB13	1
Oceanospirillaceae	Acaryochloris	1
Oceanospirillaceae	Neorickettsia	1
Oceanospirillaceae	Rhodobacterales bacterium HTCC2255	1
Paenibacillus	Acaryochloris	1
Pedobacter	SAR86 cluster	1
Photobacterium	Bermanella	1
Planctomycetales	Corynebacterium	1
Polynucleobacter	Acaryochloris	1
Polynucleobacter	Rhodobacterales bacterium HTCC2255	1
Prevotella	Bacilli	1
Prevotella	Metallosphaera	1
Prevotella	Thermobaculum	1
Prevotellaceae	Acaryochloris	1
Prochlorococcus	Nitrosococcus	1
Prochlorococcus	SAR86 cluster	1
Propionibacterium	Corynebacterium	1
Propionibacterium	Propionibacterium	1
Pseudomonas	Phyllobacteriaceae	1
Pseudovibrio	Bermanella	1
Pseudovibrio	Synechococcus	1
Ralstonia	Burkholderiaceae	1
Rhodobacterales bacterium HTCC2255	Rhodobacterales bacterium HTCC2255	1
Rhodococcus	Mycobacterium	1
Spirochaeta	Thermobaculum	1
Staphylococcus	Candidatus Pelagibacter	1
Staphylococcus	Betaproteobacterium KB13	1
Streptococcus	Rhodobacterales bacterium HTCC2255	1
Streptococcus	Betaproteobacterium KB13	1
Sulfolobus	Rhodobacterales bacterium HTCC2255	1
Synechococcus	Coraliomargarita	1
Synechococcus	Nitrosococcus	1
Synechococcus	Vibrio	1
Taylorella	Rhodobacterales bacterium HTCC2255	1
Terriglobus	Coraliomargarita	1
Thermodesulfobiaceae	Anaerobaculum	1
Thermodesulfobiaceae	Vibrio	1
Thermoplasma	Rhodobacterales bacterium HTCC2255	1
Vibrio	Neorickettsia	1
Xylella	Gammaproteobacteria	1
alpha proteobacterium HIMB114	SAR86 cluster	1
marine actinobacterium PHSC20C1	Burkholderiaceae	1
marine actinobacterium PHSC20C1	Corynebacterium	1
marine gamma proteobacterium HTCC2148	Gammaproteobacteria	1
marine gamma proteobacterium HTCC2148	Nitrosococcus	1
unclassified Campylobacterales	Flavobacteriaceae	1
unclassified Gammaproteobacteria	Vibrio	1
unclassified Gammaproteobacteria (misc.)	Coraliomargarita	1
unclassified Gammaproteobacteria (misc.)	Gammaproteobacteria	1
