# Supplementary material for: Metagenomic Exploration of Viruses throughout the Indian Ocean
Source: PLoS One. 2012 Oct 17;7(10):e42047. doi: 10.1371/journal.pone.0042047 (PMC3474794; doi:10.1371/journal.pone.0042047)
Supplement: Table S10 — NCBI RefSeq prokaryotic genomes used for building reference models. (XLS) [file pone.0042047.s012.xls]

## Sheet: mic-imm
Table S10. NCBI RefSeq prokaryotic genomes used for building reference models. One model per genome was built by concatenating all sequences for a given NCBI taxonomy ID (Taxid field). Plasmids and phage sequences were excluded.
Taxid	Accession	Name
592010	NZ_GG665858.1	Abiotrophia defectiva ATCC 49176
592010	NZ_GG665859.1	Abiotrophia defectiva ATCC 49176
592010	NZ_GG665860.1	Abiotrophia defectiva ATCC 49176
592010	NZ_GG665861.1	Abiotrophia defectiva ATCC 49176
592010	NZ_GG665862.1	Abiotrophia defectiva ATCC 49176
592010	NZ_GG665863.1	Abiotrophia defectiva ATCC 49176
592010	NZ_GG665864.1	Abiotrophia defectiva ATCC 49176
592010	NZ_GG665865.1	Abiotrophia defectiva ATCC 49176
329726	NC_009925.1	Acaryochloris marina MBIC11017
634452	NC_013209.1	Acetobacter pasteurianus IFO 3283-01
441768	NC_010163.1	Acholeplasma laidlawii PG-8A
591001	NC_013740.1	Acidaminococcus fermentans DSM 20731
525909	NC_013124.1	Acidimicrobium ferrooxidans DSM 10331
349163	NC_009484.1	Acidiphilium cryptum JF-5
243159	NC_011761.1	Acidithiobacillus ferrooxidans ATCC 23270
380394	NC_011206.1	Acidithiobacillus ferrooxidans ATCC 53993
240015	NC_012483.1	Acidobacterium capsulatum ATCC 51196
351607	NC_008578.1	Acidothermus cellulolyticus 11B
397945	NC_008752.1	Acidovorax citrulli AAC00-1
535289	NC_011992.1	Acidovorax ebreus TPSY
232721	NC_008782.1	Acidovorax sp. JS42
439481	NZ_DS990515.1	Aciduliprofundum boonei T469
439481	NZ_DS990516.1	Aciduliprofundum boonei T469
439481	NZ_DS990517.1	Aciduliprofundum boonei T469
439481	NZ_DS990518.1	Aciduliprofundum boonei T469
439481	NZ_DS990519.1	Aciduliprofundum boonei T469
439481	NZ_DS990520.1	Aciduliprofundum boonei T469
439481	NZ_DS990521.1	Aciduliprofundum boonei T469
439481	NZ_DS990522.1	Aciduliprofundum boonei T469
439481	NZ_DS990523.1	Aciduliprofundum boonei T469
439481	NZ_DS990524.1	Aciduliprofundum boonei T469
439481	NZ_DS990525.1	Aciduliprofundum boonei T469
439481	NZ_DS990526.1	Aciduliprofundum boonei T469
439481	NZ_DS990527.1	Aciduliprofundum boonei T469
439481	NZ_DS990528.1	Aciduliprofundum boonei T469
439481	NZ_DS990529.1	Aciduliprofundum boonei T469
439481	NZ_DS990530.1	Aciduliprofundum boonei T469
439481	NZ_DS990531.1	Aciduliprofundum boonei T469
439481	NZ_DS990532.1	Aciduliprofundum boonei T469
439481	NZ_DS990533.1	Aciduliprofundum boonei T469
439481	NZ_DS990534.1	Aciduliprofundum boonei T469
439481	NZ_DS990535.1	Aciduliprofundum boonei T469
439481	NZ_DS990536.1	Aciduliprofundum boonei T469
439481	NZ_DS990537.1	Aciduliprofundum boonei T469
439481	NZ_DS990538.1	Aciduliprofundum boonei T469
439481	NZ_DS990539.1	Aciduliprofundum boonei T469
439481	NZ_DS990540.1	Aciduliprofundum boonei T469
439481	NZ_DS990541.1	Aciduliprofundum boonei T469
439481	NZ_DS990542.1	Aciduliprofundum boonei T469
439481	NZ_DS990543.1	Aciduliprofundum boonei T469
439481	NZ_DS990544.1	Aciduliprofundum boonei T469
439481	NZ_DS990545.1	Aciduliprofundum boonei T469
439481	NZ_DS990546.1	Aciduliprofundum boonei T469
439481	NZ_DS990547.1	Aciduliprofundum boonei T469
439481	NZ_DS990548.1	Aciduliprofundum boonei T469
439481	NZ_DS990549.1	Aciduliprofundum boonei T469
439481	NZ_DS990550.1	Aciduliprofundum boonei T469
439481	NZ_DS990551.1	Aciduliprofundum boonei T469
439481	NZ_DS990552.1	Aciduliprofundum boonei T469
439481	NZ_DS990553.1	Aciduliprofundum boonei T469
439481	NZ_DS990554.1	Aciduliprofundum boonei T469
439481	NZ_DS990555.1	Aciduliprofundum boonei T469
439481	NC_013926.1	Aciduliprofundum boonei T469
480119	NC_011586.1	Acinetobacter baumannii AB0057
557600	NC_011595.1	Acinetobacter baumannii AB307-0294
405416	NC_010611.1	Acinetobacter baumannii ACICU
400667	NC_009085.1	Acinetobacter baumannii ATCC 17978
575584	NZ_GG704585.1	Acinetobacter baumannii ATCC 19606
575584	NZ_GG704572.1	Acinetobacter baumannii ATCC 19606
575584	NZ_GG704573.1	Acinetobacter baumannii ATCC 19606
575584	NZ_GG704574.1	Acinetobacter baumannii ATCC 19606
575584	NZ_GG704575.1	Acinetobacter baumannii ATCC 19606
575584	NZ_GG704576.1	Acinetobacter baumannii ATCC 19606
575584	NZ_GG704577.1	Acinetobacter baumannii ATCC 19606
575584	NZ_GG704578.1	Acinetobacter baumannii ATCC 19606
575584	NZ_GG704579.1	Acinetobacter baumannii ATCC 19606
575584	NZ_GG704580.1	Acinetobacter baumannii ATCC 19606
575584	NZ_GG704581.1	Acinetobacter baumannii ATCC 19606
575584	NZ_GG704582.1	Acinetobacter baumannii ATCC 19606
575584	NZ_GG704583.1	Acinetobacter baumannii ATCC 19606
575584	NZ_GG704584.1	Acinetobacter baumannii ATCC 19606
575584	NZ_GG704586.1	Acinetobacter baumannii ATCC 19606
575584	NZ_GG704587.1	Acinetobacter baumannii ATCC 19606
575584	NZ_GG704588.1	Acinetobacter baumannii ATCC 19606
575584	NZ_GG704589.1	Acinetobacter baumannii ATCC 19606
575584	NZ_GG704590.1	Acinetobacter baumannii ATCC 19606
575584	NZ_GG704591.1	Acinetobacter baumannii ATCC 19606
575584	NZ_GG704592.1	Acinetobacter baumannii ATCC 19606
575584	NZ_GG704593.1	Acinetobacter baumannii ATCC 19606
509173	NC_010410.1	Acinetobacter baumannii AYE
509170	NC_010400.1	Acinetobacter baumannii SDF
575585	NZ_GG704949.1	Acinetobacter calcoaceticus RUH2202
575585	NZ_GG704950.1	Acinetobacter calcoaceticus RUH2202
575585	NZ_GG704951.1	Acinetobacter calcoaceticus RUH2202
575585	NZ_GG704952.1	Acinetobacter calcoaceticus RUH2202
575585	NZ_GG704953.1	Acinetobacter calcoaceticus RUH2202
575585	NZ_GG704954.1	Acinetobacter calcoaceticus RUH2202
575585	NZ_GG704955.1	Acinetobacter calcoaceticus RUH2202
575585	NZ_GG704956.1	Acinetobacter calcoaceticus RUH2202
575585	NZ_GG704957.1	Acinetobacter calcoaceticus RUH2202
575585	NZ_GG704958.1	Acinetobacter calcoaceticus RUH2202
575585	NZ_GG704959.1	Acinetobacter calcoaceticus RUH2202
575585	NZ_GG704960.1	Acinetobacter calcoaceticus RUH2202
575585	NZ_GG704961.1	Acinetobacter calcoaceticus RUH2202
575585	NZ_GG704962.1	Acinetobacter calcoaceticus RUH2202
575585	NZ_GG704963.1	Acinetobacter calcoaceticus RUH2202
575586	NZ_GG704964.1	Acinetobacter johnsonii SH046
575586	NZ_GG704965.1	Acinetobacter johnsonii SH046
575586	NZ_GG704966.1	Acinetobacter johnsonii SH046
575586	NZ_GG704967.1	Acinetobacter johnsonii SH046
575586	NZ_GG704968.1	Acinetobacter johnsonii SH046
575586	NZ_GG704969.1	Acinetobacter johnsonii SH046
575586	NZ_GG704970.1	Acinetobacter johnsonii SH046
575586	NZ_GG704971.1	Acinetobacter johnsonii SH046
575586	NZ_GG704972.1	Acinetobacter johnsonii SH046
575586	NZ_GG704973.1	Acinetobacter johnsonii SH046
575586	NZ_GG704974.1	Acinetobacter johnsonii SH046
575586	NZ_GG704975.1	Acinetobacter johnsonii SH046
575586	NZ_GG704976.1	Acinetobacter johnsonii SH046
575586	NZ_GG704977.1	Acinetobacter johnsonii SH046
575586	NZ_GG704978.1	Acinetobacter johnsonii SH046
575586	NZ_GG704979.1	Acinetobacter johnsonii SH046
575586	NZ_GG704980.1	Acinetobacter johnsonii SH046
575586	NZ_GG704981.1	Acinetobacter johnsonii SH046
575586	NZ_GG704982.1	Acinetobacter johnsonii SH046
575586	NZ_GG704983.1	Acinetobacter johnsonii SH046
575586	NZ_GG704984.1	Acinetobacter johnsonii SH046
575586	NZ_GG704985.1	Acinetobacter johnsonii SH046
575586	NZ_GG704986.1	Acinetobacter johnsonii SH046
575586	NZ_GG704987.1	Acinetobacter johnsonii SH046
575586	NZ_GG704988.1	Acinetobacter johnsonii SH046
575586	NZ_GG704989.1	Acinetobacter johnsonii SH046
575586	NZ_GG704990.1	Acinetobacter johnsonii SH046
575586	NZ_GG704991.1	Acinetobacter johnsonii SH046
575586	NZ_GG704992.1	Acinetobacter johnsonii SH046
575586	NZ_GG704993.1	Acinetobacter johnsonii SH046
575586	NZ_GG704994.1	Acinetobacter johnsonii SH046
575586	NZ_GG704995.1	Acinetobacter johnsonii SH046
575586	NZ_GG704996.1	Acinetobacter johnsonii SH046
575586	NZ_GG704997.1	Acinetobacter johnsonii SH046
575586	NZ_GG704998.1	Acinetobacter johnsonii SH046
575586	NZ_GG704999.1	Acinetobacter johnsonii SH046
575586	NZ_GG705000.1	Acinetobacter johnsonii SH046
575586	NZ_GG705001.1	Acinetobacter johnsonii SH046
575586	NZ_GG705002.1	Acinetobacter johnsonii SH046
575586	NZ_GG705003.1	Acinetobacter johnsonii SH046
575586	NZ_GG705004.1	Acinetobacter johnsonii SH046
575586	NZ_GG705005.1	Acinetobacter johnsonii SH046
575586	NZ_GG705006.1	Acinetobacter johnsonii SH046
575586	NZ_GG705007.1	Acinetobacter johnsonii SH046
575586	NZ_GG705008.1	Acinetobacter johnsonii SH046
575586	NZ_GG705009.1	Acinetobacter johnsonii SH046
575586	NZ_GG705010.1	Acinetobacter johnsonii SH046
575587	NZ_GG705011.1	Acinetobacter junii SH205
575587	NZ_GG705012.1	Acinetobacter junii SH205
575587	NZ_GG705013.1	Acinetobacter junii SH205
575587	NZ_GG705014.1	Acinetobacter junii SH205
575587	NZ_GG705015.1	Acinetobacter junii SH205
575587	NZ_GG705016.1	Acinetobacter junii SH205
575587	NZ_GG705017.1	Acinetobacter junii SH205
575587	NZ_GG705018.1	Acinetobacter junii SH205
575587	NZ_GG705019.1	Acinetobacter junii SH205
575587	NZ_GG705020.1	Acinetobacter junii SH205
575587	NZ_GG705021.1	Acinetobacter junii SH205
575587	NZ_GG705022.1	Acinetobacter junii SH205
575587	NZ_GG705023.1	Acinetobacter junii SH205
575587	NZ_GG705024.1	Acinetobacter junii SH205
575587	NZ_GG705025.1	Acinetobacter junii SH205
575587	NZ_GG705026.1	Acinetobacter junii SH205
575587	NZ_GG705027.1	Acinetobacter junii SH205
575587	NZ_GG705028.1	Acinetobacter junii SH205
575587	NZ_GG705029.1	Acinetobacter junii SH205
575587	NZ_GG705030.1	Acinetobacter junii SH205
575587	NZ_GG705031.1	Acinetobacter junii SH205
575587	NZ_GG705032.1	Acinetobacter junii SH205
575587	NZ_GG705033.1	Acinetobacter junii SH205
575587	NZ_GG705034.1	Acinetobacter junii SH205
575587	NZ_GG705035.1	Acinetobacter junii SH205
575587	NZ_GG705036.1	Acinetobacter junii SH205
575587	NZ_GG705037.1	Acinetobacter junii SH205
575587	NZ_GG705038.1	Acinetobacter junii SH205
575587	NZ_GG705039.1	Acinetobacter junii SH205
575587	NZ_GG705040.1	Acinetobacter junii SH205
575587	NZ_GG705041.1	Acinetobacter junii SH205
575587	NZ_GG705042.1	Acinetobacter junii SH205
575587	NZ_GG705043.1	Acinetobacter junii SH205
575587	NZ_GG705044.1	Acinetobacter junii SH205
575587	NZ_GG705045.1	Acinetobacter junii SH205
575587	NZ_GG705046.1	Acinetobacter junii SH205
575587	NZ_GG705047.1	Acinetobacter junii SH205
575587	NZ_GG705048.1	Acinetobacter junii SH205
575587	NZ_GG705049.1	Acinetobacter junii SH205
575587	NZ_GG705050.1	Acinetobacter junii SH205
575587	NZ_GG705051.1	Acinetobacter junii SH205
575587	NZ_GG705052.1	Acinetobacter junii SH205
575587	NZ_GG705053.1	Acinetobacter junii SH205
575587	NZ_GG705054.1	Acinetobacter junii SH205
575588	NZ_GG705055.1	Acinetobacter lwoffii SH145
575588	NZ_GG705056.1	Acinetobacter lwoffii SH145
575588	NZ_GG705057.1	Acinetobacter lwoffii SH145
575588	NZ_GG705058.1	Acinetobacter lwoffii SH145
575588	NZ_GG705059.1	Acinetobacter lwoffii SH145
575588	NZ_GG705060.1	Acinetobacter lwoffii SH145
575588	NZ_GG705061.1	Acinetobacter lwoffii SH145
575588	NZ_GG705062.1	Acinetobacter lwoffii SH145
575588	NZ_GG705063.1	Acinetobacter lwoffii SH145
575588	NZ_GG705064.1	Acinetobacter lwoffii SH145
575588	NZ_GG705065.1	Acinetobacter lwoffii SH145
575588	NZ_GG705066.1	Acinetobacter lwoffii SH145
575588	NZ_GG705067.1	Acinetobacter lwoffii SH145
575588	NZ_GG705068.1	Acinetobacter lwoffii SH145
575588	NZ_GG705069.1	Acinetobacter lwoffii SH145
575588	NZ_GG705070.1	Acinetobacter lwoffii SH145
575588	NZ_GG705071.1	Acinetobacter lwoffii SH145
575588	NZ_GG705072.1	Acinetobacter lwoffii SH145
575588	NZ_GG705073.1	Acinetobacter lwoffii SH145
575588	NZ_GG705074.1	Acinetobacter lwoffii SH145
575588	NZ_GG705075.1	Acinetobacter lwoffii SH145
575588	NZ_GG705076.1	Acinetobacter lwoffii SH145
575588	NZ_GG705077.1	Acinetobacter lwoffii SH145
575588	NZ_GG705078.1	Acinetobacter lwoffii SH145
575588	NZ_GG705079.1	Acinetobacter lwoffii SH145
575588	NZ_GG705080.1	Acinetobacter lwoffii SH145
575588	NZ_GG705081.1	Acinetobacter lwoffii SH145
575588	NZ_GG705082.1	Acinetobacter lwoffii SH145
575588	NZ_GG705083.1	Acinetobacter lwoffii SH145
575588	NZ_GG705084.1	Acinetobacter lwoffii SH145
575588	NZ_GG705085.1	Acinetobacter lwoffii SH145
575588	NZ_GG705086.1	Acinetobacter lwoffii SH145
575588	NZ_GG705087.1	Acinetobacter lwoffii SH145
575588	NZ_GG705088.1	Acinetobacter lwoffii SH145
575588	NZ_GG705089.1	Acinetobacter lwoffii SH145
575588	NZ_GG705090.1	Acinetobacter lwoffii SH145
575588	NZ_GG705091.1	Acinetobacter lwoffii SH145
575588	NZ_GG705092.1	Acinetobacter lwoffii SH145
575588	NZ_GG705093.1	Acinetobacter lwoffii SH145
575588	NZ_GG705094.1	Acinetobacter lwoffii SH145
575588	NZ_GG705095.1	Acinetobacter lwoffii SH145
575588	NZ_GG705096.1	Acinetobacter lwoffii SH145
575588	NZ_GG705097.1	Acinetobacter lwoffii SH145
575588	NZ_GG705098.1	Acinetobacter lwoffii SH145
575588	NZ_GG705099.1	Acinetobacter lwoffii SH145
575588	NZ_GG705100.1	Acinetobacter lwoffii SH145
575588	NZ_GG705101.1	Acinetobacter lwoffii SH145
575588	NZ_GG705102.1	Acinetobacter lwoffii SH145
575588	NZ_GG705103.1	Acinetobacter lwoffii SH145
575588	NZ_GG705104.1	Acinetobacter lwoffii SH145
575588	NZ_GG705105.1	Acinetobacter lwoffii SH145
575588	NZ_GG705106.1	Acinetobacter lwoffii SH145
575588	NZ_GG705107.1	Acinetobacter lwoffii SH145
575588	NZ_GG705108.1	Acinetobacter lwoffii SH145
575588	NZ_GG705109.1	Acinetobacter lwoffii SH145
575588	NZ_GG705110.1	Acinetobacter lwoffii SH145
575588	NZ_GG705111.1	Acinetobacter lwoffii SH145
575588	NZ_GG705112.1	Acinetobacter lwoffii SH145
575588	NZ_GG705113.1	Acinetobacter lwoffii SH145
575588	NZ_GG705114.1	Acinetobacter lwoffii SH145
575588	NZ_GG705115.1	Acinetobacter lwoffii SH145
575588	NZ_GG705116.1	Acinetobacter lwoffii SH145
575588	NZ_GG705117.1	Acinetobacter lwoffii SH145
575588	NZ_GG705118.1	Acinetobacter lwoffii SH145
575588	NZ_GG705119.1	Acinetobacter lwoffii SH145
575588	NZ_GG705120.1	Acinetobacter lwoffii SH145
575588	NZ_GG705121.1	Acinetobacter lwoffii SH145
575588	NZ_GG705122.1	Acinetobacter lwoffii SH145
575588	NZ_GG705123.1	Acinetobacter lwoffii SH145
575588	NZ_GG705124.1	Acinetobacter lwoffii SH145
575588	NZ_GG705125.1	Acinetobacter lwoffii SH145
575588	NZ_GG705126.1	Acinetobacter lwoffii SH145
575588	NZ_GG705127.1	Acinetobacter lwoffii SH145
575588	NZ_GG705128.1	Acinetobacter lwoffii SH145
575588	NZ_GG705129.1	Acinetobacter lwoffii SH145
575588	NZ_GG705130.1	Acinetobacter lwoffii SH145
575589	NZ_GG705131.1	Acinetobacter radioresistens SH164
575589	NZ_GG705132.1	Acinetobacter radioresistens SH164
575589	NZ_GG705133.1	Acinetobacter radioresistens SH164
575589	NZ_GG705134.1	Acinetobacter radioresistens SH164
575589	NZ_GG705135.1	Acinetobacter radioresistens SH164
575589	NZ_GG705136.1	Acinetobacter radioresistens SH164
575589	NZ_GG705137.1	Acinetobacter radioresistens SH164
575589	NZ_GG705138.1	Acinetobacter radioresistens SH164
575589	NZ_GG705139.1	Acinetobacter radioresistens SH164
575589	NZ_GG705140.1	Acinetobacter radioresistens SH164
575589	NZ_GG705141.1	Acinetobacter radioresistens SH164
575589	NZ_GG705142.1	Acinetobacter radioresistens SH164
575589	NZ_GG705143.1	Acinetobacter radioresistens SH164
575589	NZ_GG705144.1	Acinetobacter radioresistens SH164
575589	NZ_GG705145.1	Acinetobacter radioresistens SH164
575589	NZ_GG705146.1	Acinetobacter radioresistens SH164
575589	NZ_GG705147.1	Acinetobacter radioresistens SH164
575589	NZ_GG705148.1	Acinetobacter radioresistens SH164
62977	NC_005966.1	Acinetobacter sp. ADP1
525244	NZ_GG665949.1	Acinetobacter sp. ATCC 27244
525244	NZ_GG665950.1	Acinetobacter sp. ATCC 27244
525244	NZ_GG665951.1	Acinetobacter sp. ATCC 27244
525244	NZ_GG665952.1	Acinetobacter sp. ATCC 27244
525244	NZ_GG665953.1	Acinetobacter sp. ATCC 27244
525244	NZ_GG665954.1	Acinetobacter sp. ATCC 27244
525244	NZ_GG665955.1	Acinetobacter sp. ATCC 27244
525244	NZ_GG665956.1	Acinetobacter sp. ATCC 27244
525244	NZ_GG665957.1	Acinetobacter sp. ATCC 27244
525244	NZ_GG665958.1	Acinetobacter sp. ATCC 27244
525244	NZ_GG665959.1	Acinetobacter sp. ATCC 27244
525244	NZ_GG665960.1	Acinetobacter sp. ATCC 27244
525244	NZ_GG665961.1	Acinetobacter sp. ATCC 27244
525244	NZ_GG665962.1	Acinetobacter sp. ATCC 27244
525244	NZ_GG665963.1	Acinetobacter sp. ATCC 27244
525244	NZ_GG665964.1	Acinetobacter sp. ATCC 27244
525244	NZ_GG665965.1	Acinetobacter sp. ATCC 27244
525244	NZ_GG665966.1	Acinetobacter sp. ATCC 27244
525244	NZ_GG665967.1	Acinetobacter sp. ATCC 27244
525244	NZ_GG665968.1	Acinetobacter sp. ATCC 27244
525244	NZ_GG665969.1	Acinetobacter sp. ATCC 27244
525244	NZ_GG665970.1	Acinetobacter sp. ATCC 27244
525244	NZ_GG665971.1	Acinetobacter sp. ATCC 27244
525244	NZ_GG665972.1	Acinetobacter sp. ATCC 27244
525244	NZ_GG665973.1	Acinetobacter sp. ATCC 27244
525244	NZ_GG665974.1	Acinetobacter sp. ATCC 27244
525244	NZ_GG665975.1	Acinetobacter sp. ATCC 27244
525244	NZ_GG665976.1	Acinetobacter sp. ATCC 27244
525244	NZ_GG665977.1	Acinetobacter sp. ATCC 27244
525244	NZ_GG665978.1	Acinetobacter sp. ATCC 27244
525244	NZ_GG665979.1	Acinetobacter sp. ATCC 27244
525244	NZ_GG665980.1	Acinetobacter sp. ATCC 27244
525244	NZ_GG665981.1	Acinetobacter sp. ATCC 27244
525244	NZ_GG665982.1	Acinetobacter sp. ATCC 27244
525244	NZ_GG665983.1	Acinetobacter sp. ATCC 27244
525244	NZ_GG665984.1	Acinetobacter sp. ATCC 27244
525244	NZ_GG665985.1	Acinetobacter sp. ATCC 27244
525244	NZ_GG665986.1	Acinetobacter sp. ATCC 27244
525244	NZ_GG665987.1	Acinetobacter sp. ATCC 27244
525244	NZ_GG665988.1	Acinetobacter sp. ATCC 27244
525244	NZ_GG665989.1	Acinetobacter sp. ATCC 27244
525244	NZ_GG665990.1	Acinetobacter sp. ATCC 27244
525244	NZ_GG665991.1	Acinetobacter sp. ATCC 27244
525244	NZ_GG665992.1	Acinetobacter sp. ATCC 27244
525244	NZ_GG665993.1	Acinetobacter sp. ATCC 27244
525244	NZ_GG665994.1	Acinetobacter sp. ATCC 27244
525244	NZ_GG665995.1	Acinetobacter sp. ATCC 27244
525244	NZ_GG665996.1	Acinetobacter sp. ATCC 27244
525244	NZ_GG665997.1	Acinetobacter sp. ATCC 27244
525244	NZ_GG665998.1	Acinetobacter sp. ATCC 27244
525244	NZ_GG665999.1	Acinetobacter sp. ATCC 27244
525244	NZ_GG666000.1	Acinetobacter sp. ATCC 27244
525244	NZ_GG666001.1	Acinetobacter sp. ATCC 27244
525244	NZ_GG666002.1	Acinetobacter sp. ATCC 27244
525244	NZ_GG666003.1	Acinetobacter sp. ATCC 27244
525244	NZ_GG666004.1	Acinetobacter sp. ATCC 27244
525244	NZ_GG666005.1	Acinetobacter sp. ATCC 27244
525244	NZ_GG666006.1	Acinetobacter sp. ATCC 27244
525244	NZ_GG666007.1	Acinetobacter sp. ATCC 27244
525244	NZ_GG666008.1	Acinetobacter sp. ATCC 27244
525244	NZ_GG666009.1	Acinetobacter sp. ATCC 27244
525244	NZ_GG666010.1	Acinetobacter sp. ATCC 27244
525244	NZ_GG666011.1	Acinetobacter sp. ATCC 27244
525244	NZ_GG666012.1	Acinetobacter sp. ATCC 27244
525244	NZ_GG666013.1	Acinetobacter sp. ATCC 27244
525244	NZ_GG666014.1	Acinetobacter sp. ATCC 27244
525244	NZ_GG666015.1	Acinetobacter sp. ATCC 27244
525244	NZ_GG666016.1	Acinetobacter sp. ATCC 27244
525244	NZ_GG666017.1	Acinetobacter sp. ATCC 27244
525244	NZ_GG666018.1	Acinetobacter sp. ATCC 27244
525244	NZ_GG666019.1	Acinetobacter sp. ATCC 27244
525244	NZ_GG666020.1	Acinetobacter sp. ATCC 27244
525244	NZ_GG666021.1	Acinetobacter sp. ATCC 27244
525244	NZ_GG666022.1	Acinetobacter sp. ATCC 27244
525244	NZ_GG666023.1	Acinetobacter sp. ATCC 27244
525244	NZ_GG666024.1	Acinetobacter sp. ATCC 27244
525244	NZ_GG666025.1	Acinetobacter sp. ATCC 27244
525244	NZ_GG666026.1	Acinetobacter sp. ATCC 27244
525244	NZ_GG666027.1	Acinetobacter sp. ATCC 27244
525244	NZ_GG666028.1	Acinetobacter sp. ATCC 27244
525244	NZ_GG666029.1	Acinetobacter sp. ATCC 27244
525244	NZ_GG666030.1	Acinetobacter sp. ATCC 27244
525244	NZ_GG666031.1	Acinetobacter sp. ATCC 27244
525244	NZ_GG666032.1	Acinetobacter sp. ATCC 27244
525244	NZ_GG666033.1	Acinetobacter sp. ATCC 27244
525244	NZ_GG666034.1	Acinetobacter sp. ATCC 27244
525244	NZ_GG666035.1	Acinetobacter sp. ATCC 27244
525244	NZ_GG666036.1	Acinetobacter sp. ATCC 27244
525244	NZ_GG666037.1	Acinetobacter sp. ATCC 27244
525244	NZ_GG666038.1	Acinetobacter sp. ATCC 27244
525244	NZ_GG666039.1	Acinetobacter sp. ATCC 27244
525244	NZ_GG666040.1	Acinetobacter sp. ATCC 27244
525244	NZ_GG666041.1	Acinetobacter sp. ATCC 27244
525244	NZ_GG666042.1	Acinetobacter sp. ATCC 27244
525244	NZ_GG666043.1	Acinetobacter sp. ATCC 27244
575564	NZ_GG704495.1	Acinetobacter sp. RUH2624
575564	NZ_GG704496.1	Acinetobacter sp. RUH2624
575564	NZ_GG704497.1	Acinetobacter sp. RUH2624
575564	NZ_GG704498.1	Acinetobacter sp. RUH2624
575564	NZ_GG704499.1	Acinetobacter sp. RUH2624
575564	NZ_GG704500.1	Acinetobacter sp. RUH2624
575564	NZ_GG704501.1	Acinetobacter sp. RUH2624
575564	NZ_GG704502.1	Acinetobacter sp. RUH2624
575564	NZ_GG704503.1	Acinetobacter sp. RUH2624
575564	NZ_GG704504.1	Acinetobacter sp. RUH2624
575564	NZ_GG704505.1	Acinetobacter sp. RUH2624
575564	NZ_GG704506.1	Acinetobacter sp. RUH2624
575564	NZ_GG704507.1	Acinetobacter sp. RUH2624
575564	NZ_GG704508.1	Acinetobacter sp. RUH2624
575564	NZ_GG704509.1	Acinetobacter sp. RUH2624
575564	NZ_GG704510.1	Acinetobacter sp. RUH2624
575564	NZ_GG704511.1	Acinetobacter sp. RUH2624
575564	NZ_GG704512.1	Acinetobacter sp. RUH2624
575564	NZ_GG704513.1	Acinetobacter sp. RUH2624
575564	NZ_GG704514.1	Acinetobacter sp. RUH2624
575564	NZ_GG704515.1	Acinetobacter sp. RUH2624
575564	NZ_GG704516.1	Acinetobacter sp. RUH2624
575564	NZ_GG704517.1	Acinetobacter sp. RUH2624
575564	NZ_GG704518.1	Acinetobacter sp. RUH2624
575564	NZ_GG704519.1	Acinetobacter sp. RUH2624
575564	NZ_GG704520.1	Acinetobacter sp. RUH2624
575564	NZ_GG704521.1	Acinetobacter sp. RUH2624
575564	NZ_GG704522.1	Acinetobacter sp. RUH2624
575564	NZ_GG704523.1	Acinetobacter sp. RUH2624
575564	NZ_GG704524.1	Acinetobacter sp. RUH2624
575564	NZ_GG704525.1	Acinetobacter sp. RUH2624
575564	NZ_GG704526.1	Acinetobacter sp. RUH2624
575564	NZ_GG704527.1	Acinetobacter sp. RUH2624
575564	NZ_GG704528.1	Acinetobacter sp. RUH2624
575564	NZ_GG704529.1	Acinetobacter sp. RUH2624
575564	NZ_GG704530.1	Acinetobacter sp. RUH2624
575564	NZ_GG704531.1	Acinetobacter sp. RUH2624
575564	NZ_GG704532.1	Acinetobacter sp. RUH2624
575564	NZ_GG704533.1	Acinetobacter sp. RUH2624
575564	NZ_GG704534.1	Acinetobacter sp. RUH2624
575564	NZ_GG704535.1	Acinetobacter sp. RUH2624
575564	NZ_GG704536.1	Acinetobacter sp. RUH2624
575564	NZ_GG704537.1	Acinetobacter sp. RUH2624
575564	NZ_GG704538.1	Acinetobacter sp. RUH2624
575564	NZ_GG704539.1	Acinetobacter sp. RUH2624
575564	NZ_GG704540.1	Acinetobacter sp. RUH2624
575564	NZ_GG704541.1	Acinetobacter sp. RUH2624
575564	NZ_GG704542.1	Acinetobacter sp. RUH2624
575564	NZ_GG704543.1	Acinetobacter sp. RUH2624
575564	NZ_GG704544.1	Acinetobacter sp. RUH2624
575564	NZ_GG704545.1	Acinetobacter sp. RUH2624
575564	NZ_GG704546.1	Acinetobacter sp. RUH2624
575564	NZ_GG704547.1	Acinetobacter sp. RUH2624
575564	NZ_GG704548.1	Acinetobacter sp. RUH2624
575564	NZ_GG704549.1	Acinetobacter sp. RUH2624
575564	NZ_GG704550.1	Acinetobacter sp. RUH2624
575564	NZ_GG704551.1	Acinetobacter sp. RUH2624
575564	NZ_GG704552.1	Acinetobacter sp. RUH2624
575564	NZ_GG704553.1	Acinetobacter sp. RUH2624
575564	NZ_GG704554.1	Acinetobacter sp. RUH2624
575564	NZ_GG704555.1	Acinetobacter sp. RUH2624
575564	NZ_GG704556.1	Acinetobacter sp. RUH2624
575564	NZ_GG704557.1	Acinetobacter sp. RUH2624
575564	NZ_GG704558.1	Acinetobacter sp. RUH2624
575564	NZ_GG704559.1	Acinetobacter sp. RUH2624
575564	NZ_GG704560.1	Acinetobacter sp. RUH2624
575564	NZ_GG704561.1	Acinetobacter sp. RUH2624
575564	NZ_GG704562.1	Acinetobacter sp. RUH2624
575564	NZ_GG704563.1	Acinetobacter sp. RUH2624
575564	NZ_GG704564.1	Acinetobacter sp. RUH2624
575564	NZ_GG704565.1	Acinetobacter sp. RUH2624
575564	NZ_GG704566.1	Acinetobacter sp. RUH2624
575564	NZ_GG704567.1	Acinetobacter sp. RUH2624
575564	NZ_GG704568.1	Acinetobacter sp. RUH2624
575564	NZ_GG704569.1	Acinetobacter sp. RUH2624
575564	NZ_GG704570.1	Acinetobacter sp. RUH2624
575564	NZ_GG704571.1	Acinetobacter sp. RUH2624
434271	NC_010278.1	Actinobacillus pleuropneumoniae serovar 3 str. JL03
416269	NC_009053.1	Actinobacillus pleuropneumoniae serovar 5b str. L20
537457	NC_010939.1	Actinobacillus pleuropneumoniae serovar 7 str. AP76
339671	NC_009655.1	Actinobacillus succinogenes 130Z
525245	NZ_DS999539.1	Actinomyces coleocanis DSM 15436
525245	NZ_DS999540.1	Actinomyces coleocanis DSM 15436
525245	NZ_DS999541.1	Actinomyces coleocanis DSM 15436
525245	NZ_DS999542.1	Actinomyces coleocanis DSM 15436
525245	NZ_DS999543.1	Actinomyces coleocanis DSM 15436
525245	NZ_DS999544.1	Actinomyces coleocanis DSM 15436
525245	NZ_DS999545.1	Actinomyces coleocanis DSM 15436
525245	NZ_DS999546.1	Actinomyces coleocanis DSM 15436
525245	NZ_DS999547.1	Actinomyces coleocanis DSM 15436
525245	NZ_DS999548.1	Actinomyces coleocanis DSM 15436
525245	NZ_DS999549.1	Actinomyces coleocanis DSM 15436
525245	NZ_DS999550.1	Actinomyces coleocanis DSM 15436
525245	NZ_DS999551.1	Actinomyces coleocanis DSM 15436
525245	NZ_DS999552.1	Actinomyces coleocanis DSM 15436
525245	NZ_DS999553.1	Actinomyces coleocanis DSM 15436
525245	NZ_DS999554.1	Actinomyces coleocanis DSM 15436
525245	NZ_DS999555.1	Actinomyces coleocanis DSM 15436
525245	NZ_DS999556.1	Actinomyces coleocanis DSM 15436
525245	NZ_DS999557.1	Actinomyces coleocanis DSM 15436
525245	NZ_DS999558.1	Actinomyces coleocanis DSM 15436
525245	NZ_DS999559.1	Actinomyces coleocanis DSM 15436
525245	NZ_DS999560.1	Actinomyces coleocanis DSM 15436
525245	NZ_DS999561.1	Actinomyces coleocanis DSM 15436
525245	NZ_DS999562.1	Actinomyces coleocanis DSM 15436
525245	NZ_DS999563.1	Actinomyces coleocanis DSM 15436
525245	NZ_DS999564.1	Actinomyces coleocanis DSM 15436
525245	NZ_DS999565.1	Actinomyces coleocanis DSM 15436
525245	NZ_DS999566.1	Actinomyces coleocanis DSM 15436
525245	NZ_DS999567.1	Actinomyces coleocanis DSM 15436
525245	NZ_DS999568.1	Actinomyces coleocanis DSM 15436
525245	NZ_DS999569.1	Actinomyces coleocanis DSM 15436
525245	NZ_DS999570.1	Actinomyces coleocanis DSM 15436
525245	NZ_DS999571.1	Actinomyces coleocanis DSM 15436
525245	NZ_DS999572.1	Actinomyces coleocanis DSM 15436
525245	NZ_DS999573.1	Actinomyces coleocanis DSM 15436
411466	NZ_DS264585.1	Actinomyces odontolyticus ATCC 17982
411466	NZ_DS264586.1	Actinomyces odontolyticus ATCC 17982
649743	NZ_GG703879.1	Actinomyces sp. oral taxon 848 str. F0332
649743	NZ_GG703880.1	Actinomyces sp. oral taxon 848 str. F0332
649743	NZ_GG703881.1	Actinomyces sp. oral taxon 848 str. F0332
649743	NZ_GG703882.1	Actinomyces sp. oral taxon 848 str. F0332
525246	NZ_DS999574.1	Actinomyces urogenitalis DSM 15434
525246	NZ_DS999575.1	Actinomyces urogenitalis DSM 15434
525246	NZ_DS999576.1	Actinomyces urogenitalis DSM 15434
525246	NZ_DS999577.1	Actinomyces urogenitalis DSM 15434
525246	NZ_DS999578.1	Actinomyces urogenitalis DSM 15434
525246	NZ_DS999579.1	Actinomyces urogenitalis DSM 15434
525246	NZ_DS999580.1	Actinomyces urogenitalis DSM 15434
525246	NZ_DS999581.1	Actinomyces urogenitalis DSM 15434
525246	NZ_DS999582.1	Actinomyces urogenitalis DSM 15434
525246	NZ_DS999583.1	Actinomyces urogenitalis DSM 15434
525246	NZ_DS999584.1	Actinomyces urogenitalis DSM 15434
525246	NZ_DS999585.1	Actinomyces urogenitalis DSM 15434
525246	NZ_DS999586.1	Actinomyces urogenitalis DSM 15434
525246	NZ_DS999587.1	Actinomyces urogenitalis DSM 15434
525246	NZ_DS999588.1	Actinomyces urogenitalis DSM 15434
525246	NZ_DS999589.1	Actinomyces urogenitalis DSM 15434
525246	NZ_DS999590.1	Actinomyces urogenitalis DSM 15434
525246	NZ_DS999591.1	Actinomyces urogenitalis DSM 15434
525246	NZ_DS999592.1	Actinomyces urogenitalis DSM 15434
525246	NZ_DS999593.1	Actinomyces urogenitalis DSM 15434
525246	NZ_DS999594.1	Actinomyces urogenitalis DSM 15434
525246	NZ_DS999595.1	Actinomyces urogenitalis DSM 15434
525246	NZ_DS999596.1	Actinomyces urogenitalis DSM 15434
525246	NZ_DS999597.1	Actinomyces urogenitalis DSM 15434
525246	NZ_DS999598.1	Actinomyces urogenitalis DSM 15434
525246	NZ_DS999599.1	Actinomyces urogenitalis DSM 15434
525246	NZ_DS999600.1	Actinomyces urogenitalis DSM 15434
525246	NZ_DS999601.1	Actinomyces urogenitalis DSM 15434
525246	NZ_DS999602.1	Actinomyces urogenitalis DSM 15434
525246	NZ_DS999603.1	Actinomyces urogenitalis DSM 15434
525246	NZ_DS999604.1	Actinomyces urogenitalis DSM 15434
525246	NZ_DS999605.1	Actinomyces urogenitalis DSM 15434
525246	NZ_DS999606.1	Actinomyces urogenitalis DSM 15434
525246	NZ_DS999607.1	Actinomyces urogenitalis DSM 15434
525246	NZ_DS999608.1	Actinomyces urogenitalis DSM 15434
525246	NZ_DS999609.1	Actinomyces urogenitalis DSM 15434
525246	NZ_DS999610.1	Actinomyces urogenitalis DSM 15434
525246	NZ_DS999611.1	Actinomyces urogenitalis DSM 15434
525246	NZ_DS999612.1	Actinomyces urogenitalis DSM 15434
525246	NZ_DS999613.1	Actinomyces urogenitalis DSM 15434
525246	NZ_DS999614.1	Actinomyces urogenitalis DSM 15434
525246	NZ_DS999615.1	Actinomyces urogenitalis DSM 15434
525246	NZ_DS999616.1	Actinomyces urogenitalis DSM 15434
525246	NZ_DS999617.1	Actinomyces urogenitalis DSM 15434
525246	NZ_DS999618.1	Actinomyces urogenitalis DSM 15434
525246	NZ_DS999619.1	Actinomyces urogenitalis DSM 15434
525246	NZ_DS999620.1	Actinomyces urogenitalis DSM 15434
525246	NZ_DS999621.1	Actinomyces urogenitalis DSM 15434
525246	NZ_DS999622.1	Actinomyces urogenitalis DSM 15434
525246	NZ_DS999623.1	Actinomyces urogenitalis DSM 15434
525246	NZ_DS999624.1	Actinomyces urogenitalis DSM 15434
525246	NZ_DS999625.1	Actinomyces urogenitalis DSM 15434
525246	NZ_DS999626.1	Actinomyces urogenitalis DSM 15434
525246	NZ_DS999627.1	Actinomyces urogenitalis DSM 15434
525246	NZ_DS999628.1	Actinomyces urogenitalis DSM 15434
525246	NZ_DS999629.1	Actinomyces urogenitalis DSM 15434
525246	NZ_DS999630.1	Actinomyces urogenitalis DSM 15434
525246	NZ_DS999631.1	Actinomyces urogenitalis DSM 15434
525246	NZ_DS999632.1	Actinomyces urogenitalis DSM 15434
525246	NZ_DS999633.1	Actinomyces urogenitalis DSM 15434
525246	NZ_DS999634.1	Actinomyces urogenitalis DSM 15434
525246	NZ_DS999635.1	Actinomyces urogenitalis DSM 15434
525246	NZ_DS999636.1	Actinomyces urogenitalis DSM 15434
525246	NZ_DS999637.1	Actinomyces urogenitalis DSM 15434
525246	NZ_DS999638.1	Actinomyces urogenitalis DSM 15434
525246	NZ_DS999639.1	Actinomyces urogenitalis DSM 15434
525246	NZ_DS999640.1	Actinomyces urogenitalis DSM 15434
446462	NC_013093.1	Actinosynnema mirum DSM 43827
380703	NC_008570.1	Aeromonas hydrophila subsp. hydrophila ATCC 7966
382245	NC_009348.1	Aeromonas salmonicida subsp. salmonicida A449
272557	NC_000854.2	Aeropyrum pernix K1
634176	NC_012913.1	Aggregatibacter aphrophilus NJ8700
311403	NC_011983.1	Agrobacterium radiobacter K84
311403	NC_011985.1	Agrobacterium radiobacter K84
176299	NC_003062.2	Agrobacterium tumefaciens str. C58
176299	NC_003063.2	Agrobacterium tumefaciens str. C58
311402	NC_011988.1	Agrobacterium vitis S4
311402	NC_011989.1	Agrobacterium vitis S4
349741	NC_010655.1	Akkermansia muciniphila ATCC BAA-835
393595	NC_008260.1	Alcanivorax borkumensis SK2
236097	NZ_DS989915.1	Alcanivorax sp. DG881
236097	NZ_DS989916.1	Alcanivorax sp. DG881
236097	NZ_DS989917.1	Alcanivorax sp. DG881
236097	NZ_DS989918.1	Alcanivorax sp. DG881
521098	NC_013205.1	Alicyclobacillus acidocaldarius subsp. acidocaldarius DSM 446
316275	NC_011312.1	Aliivibrio salmonicida LFI1238
316275	NC_011313.1	Aliivibrio salmonicida LFI1238
445970	NZ_DS499570.1	Alistipes putredinis DSM 17216
445970	NZ_DS499571.1	Alistipes putredinis DSM 17216
445970	NZ_DS499572.1	Alistipes putredinis DSM 17216
445970	NZ_DS499573.1	Alistipes putredinis DSM 17216
445970	NZ_DS499574.1	Alistipes putredinis DSM 17216
445970	NZ_DS499575.1	Alistipes putredinis DSM 17216
445970	NZ_DS499576.1	Alistipes putredinis DSM 17216
445970	NZ_DS499577.1	Alistipes putredinis DSM 17216
445970	NZ_DS499578.1	Alistipes putredinis DSM 17216
445970	NZ_DS499579.1	Alistipes putredinis DSM 17216
445970	NZ_DS499580.1	Alistipes putredinis DSM 17216
445970	NZ_DS499581.1	Alistipes putredinis DSM 17216
187272	NC_008340.1	Alkalilimnicola ehrlichii MLHE-1
293826	NC_009633.1	Alkaliphilus metalliredigens QYMF
350688	NC_009922.1	Alkaliphilus oremlandii OhILAs
572477	NC_013851.1	Allochromatium vinosum DSM 180
429009	NC_013385.1	Ammonifex degensii KC4
240292	NC_007413.1	Anabaena variabilis ATCC 29413
592015	NZ_GG705294.1	Anaerobaculum hydrogeniformans ATCC BAA-1850
592015	NZ_GG705295.1	Anaerobaculum hydrogeniformans ATCC BAA-1850
592015	NZ_GG705296.1	Anaerobaculum hydrogeniformans ATCC BAA-1850
592015	NZ_GG705297.1	Anaerobaculum hydrogeniformans ATCC BAA-1850
592015	NZ_GG705298.1	Anaerobaculum hydrogeniformans ATCC BAA-1850
592015	NZ_GG705299.1	Anaerobaculum hydrogeniformans ATCC BAA-1850
592015	NZ_GG705300.1	Anaerobaculum hydrogeniformans ATCC BAA-1850
592015	NZ_GG705301.1	Anaerobaculum hydrogeniformans ATCC BAA-1850
592015	NZ_GG705302.1	Anaerobaculum hydrogeniformans ATCC BAA-1850
592015	NZ_GG705303.1	Anaerobaculum hydrogeniformans ATCC BAA-1850
592015	NZ_GG705304.1	Anaerobaculum hydrogeniformans ATCC BAA-1850
592015	NZ_GG705305.1	Anaerobaculum hydrogeniformans ATCC BAA-1850
592015	NZ_GG705306.1	Anaerobaculum hydrogeniformans ATCC BAA-1850
592015	NZ_GG705307.1	Anaerobaculum hydrogeniformans ATCC BAA-1850
592015	NZ_GG705308.1	Anaerobaculum hydrogeniformans ATCC BAA-1850
592015	NZ_GG705309.1	Anaerobaculum hydrogeniformans ATCC BAA-1850
592015	NZ_GG705310.1	Anaerobaculum hydrogeniformans ATCC BAA-1850
592015	NZ_GG705311.1	Anaerobaculum hydrogeniformans ATCC BAA-1850
592015	NZ_GG705312.1	Anaerobaculum hydrogeniformans ATCC BAA-1850
592015	NZ_GG705313.1	Anaerobaculum hydrogeniformans ATCC BAA-1850
592015	NZ_GG705314.1	Anaerobaculum hydrogeniformans ATCC BAA-1850
592015	NZ_GG705315.1	Anaerobaculum hydrogeniformans ATCC BAA-1850
592015	NZ_GG705316.1	Anaerobaculum hydrogeniformans ATCC BAA-1850
592015	NZ_GG705317.1	Anaerobaculum hydrogeniformans ATCC BAA-1850
592015	NZ_GG705318.1	Anaerobaculum hydrogeniformans ATCC BAA-1850
592015	NZ_GG705319.1	Anaerobaculum hydrogeniformans ATCC BAA-1850
592015	NZ_GG705320.1	Anaerobaculum hydrogeniformans ATCC BAA-1850
592015	NZ_GG705321.1	Anaerobaculum hydrogeniformans ATCC BAA-1850
592015	NZ_GG705322.1	Anaerobaculum hydrogeniformans ATCC BAA-1850
592015	NZ_GG705323.1	Anaerobaculum hydrogeniformans ATCC BAA-1850
592015	NZ_GG705324.1	Anaerobaculum hydrogeniformans ATCC BAA-1850
592015	NZ_GG705325.1	Anaerobaculum hydrogeniformans ATCC BAA-1850
592015	NZ_GG705326.1	Anaerobaculum hydrogeniformans ATCC BAA-1850
592015	NZ_GG705327.1	Anaerobaculum hydrogeniformans ATCC BAA-1850
592015	NZ_GG705328.1	Anaerobaculum hydrogeniformans ATCC BAA-1850
592015	NZ_GG705329.1	Anaerobaculum hydrogeniformans ATCC BAA-1850
592015	NZ_GG705330.1	Anaerobaculum hydrogeniformans ATCC BAA-1850
592015	NZ_GG705331.1	Anaerobaculum hydrogeniformans ATCC BAA-1850
592015	NZ_GG705332.1	Anaerobaculum hydrogeniformans ATCC BAA-1850
592015	NZ_GG705333.1	Anaerobaculum hydrogeniformans ATCC BAA-1850
592015	NZ_GG705334.1	Anaerobaculum hydrogeniformans ATCC BAA-1850
592015	NZ_GG705335.1	Anaerobaculum hydrogeniformans ATCC BAA-1850
592015	NZ_GG705336.1	Anaerobaculum hydrogeniformans ATCC BAA-1850
592015	NZ_GG705337.1	Anaerobaculum hydrogeniformans ATCC BAA-1850
592015	NZ_GG705338.1	Anaerobaculum hydrogeniformans ATCC BAA-1850
592015	NZ_GG705339.1	Anaerobaculum hydrogeniformans ATCC BAA-1850
592015	NZ_GG705340.1	Anaerobaculum hydrogeniformans ATCC BAA-1850
592015	NZ_GG705341.1	Anaerobaculum hydrogeniformans ATCC BAA-1850
592015	NZ_GG705342.1	Anaerobaculum hydrogeniformans ATCC BAA-1850
592015	NZ_GG705343.1	Anaerobaculum hydrogeniformans ATCC BAA-1850
592015	NZ_GG705344.1	Anaerobaculum hydrogeniformans ATCC BAA-1850
592015	NZ_GG705345.1	Anaerobaculum hydrogeniformans ATCC BAA-1850
592015	NZ_GG705346.1	Anaerobaculum hydrogeniformans ATCC BAA-1850
592015	NZ_GG705347.1	Anaerobaculum hydrogeniformans ATCC BAA-1850
592015	NZ_GG705348.1	Anaerobaculum hydrogeniformans ATCC BAA-1850
592015	NZ_GG705349.1	Anaerobaculum hydrogeniformans ATCC BAA-1850
592015	NZ_GG705350.1	Anaerobaculum hydrogeniformans ATCC BAA-1850
592015	NZ_GG705351.1	Anaerobaculum hydrogeniformans ATCC BAA-1850
592015	NZ_GG705352.1	Anaerobaculum hydrogeniformans ATCC BAA-1850
592015	NZ_GG705353.1	Anaerobaculum hydrogeniformans ATCC BAA-1850
592015	NZ_GG705354.1	Anaerobaculum hydrogeniformans ATCC BAA-1850
592015	NZ_GG705355.1	Anaerobaculum hydrogeniformans ATCC BAA-1850
592015	NZ_GG705356.1	Anaerobaculum hydrogeniformans ATCC BAA-1850
592015	NZ_GG705357.1	Anaerobaculum hydrogeniformans ATCC BAA-1850
592015	NZ_GG705358.1	Anaerobaculum hydrogeniformans ATCC BAA-1850
592015	NZ_GG705359.1	Anaerobaculum hydrogeniformans ATCC BAA-1850
592015	NZ_GG705360.1	Anaerobaculum hydrogeniformans ATCC BAA-1850
592015	NZ_GG705361.1	Anaerobaculum hydrogeniformans ATCC BAA-1850
592015	NZ_GG705362.1	Anaerobaculum hydrogeniformans ATCC BAA-1850
592015	NZ_GG705363.1	Anaerobaculum hydrogeniformans ATCC BAA-1850
592015	NZ_GG705364.1	Anaerobaculum hydrogeniformans ATCC BAA-1850
592015	NZ_GG705365.1	Anaerobaculum hydrogeniformans ATCC BAA-1850
592015	NZ_GG705366.1	Anaerobaculum hydrogeniformans ATCC BAA-1850
592015	NZ_GG705367.1	Anaerobaculum hydrogeniformans ATCC BAA-1850
592015	NZ_GG705368.1	Anaerobaculum hydrogeniformans ATCC BAA-1850
592015	NZ_GG705369.1	Anaerobaculum hydrogeniformans ATCC BAA-1850
592015	NZ_GG705370.1	Anaerobaculum hydrogeniformans ATCC BAA-1850
592015	NZ_GG705371.1	Anaerobaculum hydrogeniformans ATCC BAA-1850
592015	NZ_GG705372.1	Anaerobaculum hydrogeniformans ATCC BAA-1850
592015	NZ_GG705373.1	Anaerobaculum hydrogeniformans ATCC BAA-1850
592015	NZ_GG705374.1	Anaerobaculum hydrogeniformans ATCC BAA-1850
592015	NZ_GG705375.1	Anaerobaculum hydrogeniformans ATCC BAA-1850
592015	NZ_GG705376.1	Anaerobaculum hydrogeniformans ATCC BAA-1850
592015	NZ_GG705377.1	Anaerobaculum hydrogeniformans ATCC BAA-1850
592015	NZ_GG705378.1	Anaerobaculum hydrogeniformans ATCC BAA-1850
592015	NZ_GG705379.1	Anaerobaculum hydrogeniformans ATCC BAA-1850
592015	NZ_GG705380.1	Anaerobaculum hydrogeniformans ATCC BAA-1850
592015	NZ_GG705381.1	Anaerobaculum hydrogeniformans ATCC BAA-1850
592015	NZ_GG705382.1	Anaerobaculum hydrogeniformans ATCC BAA-1850
592015	NZ_GG705383.1	Anaerobaculum hydrogeniformans ATCC BAA-1850
592015	NZ_GG705384.1	Anaerobaculum hydrogeniformans ATCC BAA-1850
592015	NZ_GG705385.1	Anaerobaculum hydrogeniformans ATCC BAA-1850
592015	NZ_GG705386.1	Anaerobaculum hydrogeniformans ATCC BAA-1850
592015	NZ_GG705387.1	Anaerobaculum hydrogeniformans ATCC BAA-1850
592015	NZ_GG705388.1	Anaerobaculum hydrogeniformans ATCC BAA-1850
592015	NZ_GG705389.1	Anaerobaculum hydrogeniformans ATCC BAA-1850
592015	NZ_GG705390.1	Anaerobaculum hydrogeniformans ATCC BAA-1850
592015	NZ_GG705391.1	Anaerobaculum hydrogeniformans ATCC BAA-1850
592015	NZ_GG705392.1	Anaerobaculum hydrogeniformans ATCC BAA-1850
592015	NZ_GG705393.1	Anaerobaculum hydrogeniformans ATCC BAA-1850
592015	NZ_GG705394.1	Anaerobaculum hydrogeniformans ATCC BAA-1850
592015	NZ_GG705395.1	Anaerobaculum hydrogeniformans ATCC BAA-1850
592015	NZ_GG705396.1	Anaerobaculum hydrogeniformans ATCC BAA-1850
592015	NZ_GG705397.1	Anaerobaculum hydrogeniformans ATCC BAA-1850
592015	NZ_GG705398.1	Anaerobaculum hydrogeniformans ATCC BAA-1850
592015	NZ_GG705399.1	Anaerobaculum hydrogeniformans ATCC BAA-1850
592015	NZ_GG705400.1	Anaerobaculum hydrogeniformans ATCC BAA-1850
592015	NZ_GG705401.1	Anaerobaculum hydrogeniformans ATCC BAA-1850
592015	NZ_GG705402.1	Anaerobaculum hydrogeniformans ATCC BAA-1850
592015	NZ_GG705403.1	Anaerobaculum hydrogeniformans ATCC BAA-1850
592015	NZ_GG705404.1	Anaerobaculum hydrogeniformans ATCC BAA-1850
592015	NZ_GG705405.1	Anaerobaculum hydrogeniformans ATCC BAA-1850
592015	NZ_GG705406.1	Anaerobaculum hydrogeniformans ATCC BAA-1850
525254	NZ_GG666044.1	Anaerococcus lactolyticus ATCC 51172
525254	NZ_GG666045.1	Anaerococcus lactolyticus ATCC 51172
525254	NZ_GG666046.1	Anaerococcus lactolyticus ATCC 51172
525254	NZ_GG666047.1	Anaerococcus lactolyticus ATCC 51172
525254	NZ_GG666048.1	Anaerococcus lactolyticus ATCC 51172
525254	NZ_GG666049.1	Anaerococcus lactolyticus ATCC 51172
525254	NZ_GG666050.1	Anaerococcus lactolyticus ATCC 51172
525254	NZ_GG666051.1	Anaerococcus lactolyticus ATCC 51172
525254	NZ_GG666052.1	Anaerococcus lactolyticus ATCC 51172
525254	NZ_GG666053.1	Anaerococcus lactolyticus ATCC 51172
525254	NZ_GG666054.1	Anaerococcus lactolyticus ATCC 51172
525254	NZ_GG666055.1	Anaerococcus lactolyticus ATCC 51172
525254	NZ_GG666056.1	Anaerococcus lactolyticus ATCC 51172
525254	NZ_GG666057.1	Anaerococcus lactolyticus ATCC 51172
525254	NZ_GG666058.1	Anaerococcus lactolyticus ATCC 51172
525254	NZ_GG666059.1	Anaerococcus lactolyticus ATCC 51172
525254	NZ_GG666060.1	Anaerococcus lactolyticus ATCC 51172
525254	NZ_GG666061.1	Anaerococcus lactolyticus ATCC 51172
525254	NZ_GG666062.1	Anaerococcus lactolyticus ATCC 51172
525254	NZ_GG666063.1	Anaerococcus lactolyticus ATCC 51172
525254	NZ_GG666064.1	Anaerococcus lactolyticus ATCC 51172
525254	NZ_GG666065.1	Anaerococcus lactolyticus ATCC 51172
525254	NZ_GG666066.1	Anaerococcus lactolyticus ATCC 51172
525254	NZ_GG666067.1	Anaerococcus lactolyticus ATCC 51172
525254	NZ_GG666068.1	Anaerococcus lactolyticus ATCC 51172
525254	NZ_GG666069.1	Anaerococcus lactolyticus ATCC 51172
525254	NZ_GG666070.1	Anaerococcus lactolyticus ATCC 51172
525254	NZ_GG666071.1	Anaerococcus lactolyticus ATCC 51172
525254	NZ_GG666072.1	Anaerococcus lactolyticus ATCC 51172
525254	NZ_GG666073.1	Anaerococcus lactolyticus ATCC 51172
525254	NZ_GG666074.1	Anaerococcus lactolyticus ATCC 51172
525254	NZ_GG666075.1	Anaerococcus lactolyticus ATCC 51172
525254	NZ_GG666076.1	Anaerococcus lactolyticus ATCC 51172
525254	NZ_GG666077.1	Anaerococcus lactolyticus ATCC 51172
525254	NZ_GG666078.1	Anaerococcus lactolyticus ATCC 51172
525254	NZ_GG666079.1	Anaerococcus lactolyticus ATCC 51172
525254	NZ_GG666080.1	Anaerococcus lactolyticus ATCC 51172
525254	NZ_GG666081.1	Anaerococcus lactolyticus ATCC 51172
525254	NZ_GG666082.1	Anaerococcus lactolyticus ATCC 51172
525254	NZ_GG666083.1	Anaerococcus lactolyticus ATCC 51172
525254	NZ_GG666084.1	Anaerococcus lactolyticus ATCC 51172
525254	NZ_GG666085.1	Anaerococcus lactolyticus ATCC 51172
525254	NZ_GG666086.1	Anaerococcus lactolyticus ATCC 51172
525254	NZ_GG666087.1	Anaerococcus lactolyticus ATCC 51172
525254	NZ_GG666088.1	Anaerococcus lactolyticus ATCC 51172
525254	NZ_GG666089.1	Anaerococcus lactolyticus ATCC 51172
525254	NZ_GG666090.1	Anaerococcus lactolyticus ATCC 51172
525254	NZ_GG666091.1	Anaerococcus lactolyticus ATCC 51172
525254	NZ_GG666092.1	Anaerococcus lactolyticus ATCC 51172
525254	NZ_GG666093.1	Anaerococcus lactolyticus ATCC 51172
525254	NZ_GG666094.1	Anaerococcus lactolyticus ATCC 51172
525254	NZ_GG666095.1	Anaerococcus lactolyticus ATCC 51172
525254	NZ_GG666096.1	Anaerococcus lactolyticus ATCC 51172
525254	NZ_GG666097.1	Anaerococcus lactolyticus ATCC 51172
525254	NZ_GG666098.1	Anaerococcus lactolyticus ATCC 51172
525254	NZ_GG666099.1	Anaerococcus lactolyticus ATCC 51172
525254	NZ_GG666100.1	Anaerococcus lactolyticus ATCC 51172
525254	NZ_GG666101.1	Anaerococcus lactolyticus ATCC 51172
525254	NZ_GG666102.1	Anaerococcus lactolyticus ATCC 51172
525254	NZ_GG666103.1	Anaerococcus lactolyticus ATCC 51172
525254	NZ_GG666104.1	Anaerococcus lactolyticus ATCC 51172
525254	NZ_GG666105.1	Anaerococcus lactolyticus ATCC 51172
525254	NZ_GG666106.1	Anaerococcus lactolyticus ATCC 51172
525254	NZ_GG666107.1	Anaerococcus lactolyticus ATCC 51172
525254	NZ_GG666108.1	Anaerococcus lactolyticus ATCC 51172
525254	NZ_GG666109.1	Anaerococcus lactolyticus ATCC 51172
525254	NZ_GG666110.1	Anaerococcus lactolyticus ATCC 51172
525254	NZ_GG666111.1	Anaerococcus lactolyticus ATCC 51172
525254	NZ_GG666112.1	Anaerococcus lactolyticus ATCC 51172
525254	NZ_GG666113.1	Anaerococcus lactolyticus ATCC 51172
525254	NZ_GG666114.1	Anaerococcus lactolyticus ATCC 51172
525254	NZ_GG666115.1	Anaerococcus lactolyticus ATCC 51172
525254	NZ_GG666116.1	Anaerococcus lactolyticus ATCC 51172
525254	NZ_GG666117.1	Anaerococcus lactolyticus ATCC 51172
525254	NZ_GG666118.1	Anaerococcus lactolyticus ATCC 51172
525254	NZ_GG666119.1	Anaerococcus lactolyticus ATCC 51172
525254	NZ_GG666120.1	Anaerococcus lactolyticus ATCC 51172
525254	NZ_GG666121.1	Anaerococcus lactolyticus ATCC 51172
525254	NZ_GG666122.1	Anaerococcus lactolyticus ATCC 51172
525254	NZ_GG666123.1	Anaerococcus lactolyticus ATCC 51172
525254	NZ_GG666124.1	Anaerococcus lactolyticus ATCC 51172
525254	NZ_GG666125.1	Anaerococcus lactolyticus ATCC 51172
525254	NZ_GG666126.1	Anaerococcus lactolyticus ATCC 51172
525254	NZ_GG666127.1	Anaerococcus lactolyticus ATCC 51172
525254	NZ_GG666128.1	Anaerococcus lactolyticus ATCC 51172
525254	NZ_GG666129.1	Anaerococcus lactolyticus ATCC 51172
525254	NZ_GG666130.1	Anaerococcus lactolyticus ATCC 51172
525254	NZ_GG666131.1	Anaerococcus lactolyticus ATCC 51172
525254	NZ_GG666132.1	Anaerococcus lactolyticus ATCC 51172
525254	NZ_GG666133.1	Anaerococcus lactolyticus ATCC 51172
525254	NZ_GG666134.1	Anaerococcus lactolyticus ATCC 51172
525254	NZ_GG666135.1	Anaerococcus lactolyticus ATCC 51172
525254	NZ_GG666136.1	Anaerococcus lactolyticus ATCC 51172
525254	NZ_GG666137.1	Anaerococcus lactolyticus ATCC 51172
525254	NZ_GG666138.1	Anaerococcus lactolyticus ATCC 51172
525254	NZ_GG666139.1	Anaerococcus lactolyticus ATCC 51172
525254	NZ_GG666140.1	Anaerococcus lactolyticus ATCC 51172
525254	NZ_GG666141.1	Anaerococcus lactolyticus ATCC 51172
525254	NZ_GG666142.1	Anaerococcus lactolyticus ATCC 51172
525254	NZ_GG666143.1	Anaerococcus lactolyticus ATCC 51172
525254	NZ_GG666144.1	Anaerococcus lactolyticus ATCC 51172
525254	NZ_GG666145.1	Anaerococcus lactolyticus ATCC 51172
525254	NZ_GG666146.1	Anaerococcus lactolyticus ATCC 51172
525254	NZ_GG666147.1	Anaerococcus lactolyticus ATCC 51172
525254	NZ_GG666148.1	Anaerococcus lactolyticus ATCC 51172
525254	NZ_GG666149.1	Anaerococcus lactolyticus ATCC 51172
525254	NZ_GG666150.1	Anaerococcus lactolyticus ATCC 51172
525254	NZ_GG666151.1	Anaerococcus lactolyticus ATCC 51172
525254	NZ_GG666152.1	Anaerococcus lactolyticus ATCC 51172
525254	NZ_GG666153.1	Anaerococcus lactolyticus ATCC 51172
525254	NZ_GG666154.1	Anaerococcus lactolyticus ATCC 51172
525254	NZ_GG666155.1	Anaerococcus lactolyticus ATCC 51172
525254	NZ_GG666156.1	Anaerococcus lactolyticus ATCC 51172
525254	NZ_GG666157.1	Anaerococcus lactolyticus ATCC 51172
525254	NZ_GG666158.1	Anaerococcus lactolyticus ATCC 51172
525254	NZ_GG666159.1	Anaerococcus lactolyticus ATCC 51172
525254	NZ_GG666160.1	Anaerococcus lactolyticus ATCC 51172
525254	NZ_GG666161.1	Anaerococcus lactolyticus ATCC 51172
525254	NZ_GG666162.1	Anaerococcus lactolyticus ATCC 51172
525254	NZ_GG666163.1	Anaerococcus lactolyticus ATCC 51172
525254	NZ_GG666164.1	Anaerococcus lactolyticus ATCC 51172
525254	NZ_GG666165.1	Anaerococcus lactolyticus ATCC 51172
525254	NZ_GG666166.1	Anaerococcus lactolyticus ATCC 51172
525254	NZ_GG666167.1	Anaerococcus lactolyticus ATCC 51172
525254	NZ_GG666168.1	Anaerococcus lactolyticus ATCC 51172
525254	NZ_GG666169.1	Anaerococcus lactolyticus ATCC 51172
525254	NZ_GG666170.1	Anaerococcus lactolyticus ATCC 51172
525254	NZ_GG666171.1	Anaerococcus lactolyticus ATCC 51172
525254	NZ_GG666172.1	Anaerococcus lactolyticus ATCC 51172
525254	NZ_GG666173.1	Anaerococcus lactolyticus ATCC 51172
525254	NZ_GG666174.1	Anaerococcus lactolyticus ATCC 51172
525254	NZ_GG666175.1	Anaerococcus lactolyticus ATCC 51172
525254	NZ_GG666176.1	Anaerococcus lactolyticus ATCC 51172
525254	NZ_GG666177.1	Anaerococcus lactolyticus ATCC 51172
525254	NZ_GG666178.1	Anaerococcus lactolyticus ATCC 51172
525254	NZ_GG666179.1	Anaerococcus lactolyticus ATCC 51172
525254	NZ_GG666180.1	Anaerococcus lactolyticus ATCC 51172
525254	NZ_GG666181.1	Anaerococcus lactolyticus ATCC 51172
525254	NZ_GG666182.1	Anaerococcus lactolyticus ATCC 51172
525254	NZ_GG666183.1	Anaerococcus lactolyticus ATCC 51172
525254	NZ_GG666184.1	Anaerococcus lactolyticus ATCC 51172
525254	NZ_GG666185.1	Anaerococcus lactolyticus ATCC 51172
525254	NZ_GG666186.1	Anaerococcus lactolyticus ATCC 51172
525254	NZ_GG666187.1	Anaerococcus lactolyticus ATCC 51172
525254	NZ_GG666188.1	Anaerococcus lactolyticus ATCC 51172
525254	NZ_GG666189.1	Anaerococcus lactolyticus ATCC 51172
525254	NZ_GG666190.1	Anaerococcus lactolyticus ATCC 51172
525254	NZ_GG666191.1	Anaerococcus lactolyticus ATCC 51172
525254	NZ_GG666192.1	Anaerococcus lactolyticus ATCC 51172
525254	NZ_GG666193.1	Anaerococcus lactolyticus ATCC 51172
525254	NZ_GG666194.1	Anaerococcus lactolyticus ATCC 51172
525254	NZ_GG666195.1	Anaerococcus lactolyticus ATCC 51172
525254	NZ_GG666196.1	Anaerococcus lactolyticus ATCC 51172
525254	NZ_GG666197.1	Anaerococcus lactolyticus ATCC 51172
525254	NZ_GG666198.1	Anaerococcus lactolyticus ATCC 51172
525254	NZ_GG666199.1	Anaerococcus lactolyticus ATCC 51172
525254	NZ_GG666200.1	Anaerococcus lactolyticus ATCC 51172
525254	NZ_GG666201.1	Anaerococcus lactolyticus ATCC 51172
525254	NZ_GG666202.1	Anaerococcus lactolyticus ATCC 51172
525254	NZ_GG666203.1	Anaerococcus lactolyticus ATCC 51172
525254	NZ_GG666204.1	Anaerococcus lactolyticus ATCC 51172
525254	NZ_GG666205.1	Anaerococcus lactolyticus ATCC 51172
525254	NZ_GG666206.1	Anaerococcus lactolyticus ATCC 51172
525254	NZ_GG666207.1	Anaerococcus lactolyticus ATCC 51172
525254	NZ_GG666208.1	Anaerococcus lactolyticus ATCC 51172
525254	NZ_GG666209.1	Anaerococcus lactolyticus ATCC 51172
525254	NZ_GG666210.1	Anaerococcus lactolyticus ATCC 51172
525254	NZ_GG666211.1	Anaerococcus lactolyticus ATCC 51172
525254	NZ_GG666212.1	Anaerococcus lactolyticus ATCC 51172
525254	NZ_GG666213.1	Anaerococcus lactolyticus ATCC 51172
525254	NZ_GG666214.1	Anaerococcus lactolyticus ATCC 51172
525254	NZ_GG666215.1	Anaerococcus lactolyticus ATCC 51172
525254	NZ_GG666216.1	Anaerococcus lactolyticus ATCC 51172
525254	NZ_GG666217.1	Anaerococcus lactolyticus ATCC 51172
525254	NZ_GG666218.1	Anaerococcus lactolyticus ATCC 51172
525254	NZ_GG666219.1	Anaerococcus lactolyticus ATCC 51172
525254	NZ_GG666220.1	Anaerococcus lactolyticus ATCC 51172
525254	NZ_GG666221.1	Anaerococcus lactolyticus ATCC 51172
525254	NZ_GG666222.1	Anaerococcus lactolyticus ATCC 51172
525254	NZ_GG666223.1	Anaerococcus lactolyticus ATCC 51172
525254	NZ_GG666224.1	Anaerococcus lactolyticus ATCC 51172
525254	NZ_GG666225.1	Anaerococcus lactolyticus ATCC 51172
525254	NZ_GG666226.1	Anaerococcus lactolyticus ATCC 51172
525254	NZ_GG666227.1	Anaerococcus lactolyticus ATCC 51172
525254	NZ_GG666228.1	Anaerococcus lactolyticus ATCC 51172
525254	NZ_GG666229.1	Anaerococcus lactolyticus ATCC 51172
525254	NZ_GG666230.1	Anaerococcus lactolyticus ATCC 51172
525254	NZ_GG666231.1	Anaerococcus lactolyticus ATCC 51172
525254	NZ_GG666232.1	Anaerococcus lactolyticus ATCC 51172
525254	NZ_GG666233.1	Anaerococcus lactolyticus ATCC 51172
525254	NZ_GG666234.1	Anaerococcus lactolyticus ATCC 51172
525254	NZ_GG666235.1	Anaerococcus lactolyticus ATCC 51172
525254	NZ_GG666236.1	Anaerococcus lactolyticus ATCC 51172
525254	NZ_GG666237.1	Anaerococcus lactolyticus ATCC 51172
525254	NZ_GG666238.1	Anaerococcus lactolyticus ATCC 51172
525254	NZ_GG666239.1	Anaerococcus lactolyticus ATCC 51172
525254	NZ_GG666240.1	Anaerococcus lactolyticus ATCC 51172
525254	NZ_GG666241.1	Anaerococcus lactolyticus ATCC 51172
525254	NZ_GG666242.1	Anaerococcus lactolyticus ATCC 51172
525254	NZ_GG666243.1	Anaerococcus lactolyticus ATCC 51172
525254	NZ_GG666244.1	Anaerococcus lactolyticus ATCC 51172
525254	NZ_GG666245.1	Anaerococcus lactolyticus ATCC 51172
525254	NZ_GG666246.1	Anaerococcus lactolyticus ATCC 51172
525254	NZ_GG666247.1	Anaerococcus lactolyticus ATCC 51172
525254	NZ_GG666248.1	Anaerococcus lactolyticus ATCC 51172
525254	NZ_GG666249.1	Anaerococcus lactolyticus ATCC 51172
525254	NZ_GG666250.1	Anaerococcus lactolyticus ATCC 51172
525254	NZ_GG666251.1	Anaerococcus lactolyticus ATCC 51172
525254	NZ_GG666252.1	Anaerococcus lactolyticus ATCC 51172
525254	NZ_GG666253.1	Anaerococcus lactolyticus ATCC 51172
525254	NZ_GG666254.1	Anaerococcus lactolyticus ATCC 51172
525254	NZ_GG666255.1	Anaerococcus lactolyticus ATCC 51172
525254	NZ_GG666256.1	Anaerococcus lactolyticus ATCC 51172
525254	NZ_GG666257.1	Anaerococcus lactolyticus ATCC 51172
525254	NZ_GG666258.1	Anaerococcus lactolyticus ATCC 51172
525254	NZ_GG666259.1	Anaerococcus lactolyticus ATCC 51172
525254	NZ_GG666260.1	Anaerococcus lactolyticus ATCC 51172
525254	NZ_GG666261.1	Anaerococcus lactolyticus ATCC 51172
525254	NZ_GG666262.1	Anaerococcus lactolyticus ATCC 51172
525254	NZ_GG666263.1	Anaerococcus lactolyticus ATCC 51172
525254	NZ_GG666264.1	Anaerococcus lactolyticus ATCC 51172
525254	NZ_GG666265.1	Anaerococcus lactolyticus ATCC 51172
525254	NZ_GG666266.1	Anaerococcus lactolyticus ATCC 51172
525254	NZ_GG666267.1	Anaerococcus lactolyticus ATCC 51172
525254	NZ_GG666268.1	Anaerococcus lactolyticus ATCC 51172
525254	NZ_GG666269.1	Anaerococcus lactolyticus ATCC 51172
525254	NZ_GG666270.1	Anaerococcus lactolyticus ATCC 51172
525254	NZ_GG666271.1	Anaerococcus lactolyticus ATCC 51172
525254	NZ_GG666272.1	Anaerococcus lactolyticus ATCC 51172
525254	NZ_GG666273.1	Anaerococcus lactolyticus ATCC 51172
525254	NZ_GG666274.1	Anaerococcus lactolyticus ATCC 51172
525254	NZ_GG666275.1	Anaerococcus lactolyticus ATCC 51172
525254	NZ_GG666276.1	Anaerococcus lactolyticus ATCC 51172
525254	NZ_GG666277.1	Anaerococcus lactolyticus ATCC 51172
525254	NZ_GG666278.1	Anaerococcus lactolyticus ATCC 51172
525254	NZ_GG666279.1	Anaerococcus lactolyticus ATCC 51172
525254	NZ_GG666280.1	Anaerococcus lactolyticus ATCC 51172
525254	NZ_GG666281.1	Anaerococcus lactolyticus ATCC 51172
525254	NZ_GG666282.1	Anaerococcus lactolyticus ATCC 51172
525254	NZ_GG666283.1	Anaerococcus lactolyticus ATCC 51172
525254	NZ_GG666284.1	Anaerococcus lactolyticus ATCC 51172
525254	NZ_GG666285.1	Anaerococcus lactolyticus ATCC 51172
525254	NZ_GG666286.1	Anaerococcus lactolyticus ATCC 51172
525254	NZ_GG666287.1	Anaerococcus lactolyticus ATCC 51172
525254	NZ_GG666288.1	Anaerococcus lactolyticus ATCC 51172
525254	NZ_GG666289.1	Anaerococcus lactolyticus ATCC 51172
525254	NZ_GG666290.1	Anaerococcus lactolyticus ATCC 51172
525254	NZ_GG666291.1	Anaerococcus lactolyticus ATCC 51172
525254	NZ_GG666292.1	Anaerococcus lactolyticus ATCC 51172
525254	NZ_GG666293.1	Anaerococcus lactolyticus ATCC 51172
525254	NZ_GG666294.1	Anaerococcus lactolyticus ATCC 51172
525919	NC_013171.1	Anaerococcus prevotii DSM 20548
525255	NZ_GG666295.1	Anaerococcus tetradius ATCC 35098
525255	NZ_GG666296.1	Anaerococcus tetradius ATCC 35098
525255	NZ_GG666297.1	Anaerococcus tetradius ATCC 35098
525255	NZ_GG666298.1	Anaerococcus tetradius ATCC 35098
525255	NZ_GG666299.1	Anaerococcus tetradius ATCC 35098
525255	NZ_GG666300.1	Anaerococcus tetradius ATCC 35098
525255	NZ_GG666301.1	Anaerococcus tetradius ATCC 35098
525255	NZ_GG666302.1	Anaerococcus tetradius ATCC 35098
525255	NZ_GG666303.1	Anaerococcus tetradius ATCC 35098
525255	NZ_GG666304.1	Anaerococcus tetradius ATCC 35098
525255	NZ_GG666305.1	Anaerococcus tetradius ATCC 35098
525255	NZ_GG666306.1	Anaerococcus tetradius ATCC 35098
525255	NZ_GG666307.1	Anaerococcus tetradius ATCC 35098
525255	NZ_GG666308.1	Anaerococcus tetradius ATCC 35098
525255	NZ_GG666309.1	Anaerococcus tetradius ATCC 35098
525255	NZ_GG666310.1	Anaerococcus tetradius ATCC 35098
525255	NZ_GG666311.1	Anaerococcus tetradius ATCC 35098
525255	NZ_GG666312.1	Anaerococcus tetradius ATCC 35098
525255	NZ_GG666313.1	Anaerococcus tetradius ATCC 35098
525255	NZ_GG666314.1	Anaerococcus tetradius ATCC 35098
525255	NZ_GG666315.1	Anaerococcus tetradius ATCC 35098
525255	NZ_GG666316.1	Anaerococcus tetradius ATCC 35098
525255	NZ_GG666317.1	Anaerococcus tetradius ATCC 35098
525255	NZ_GG666318.1	Anaerococcus tetradius ATCC 35098
525255	NZ_GG666319.1	Anaerococcus tetradius ATCC 35098
525255	NZ_GG666320.1	Anaerococcus tetradius ATCC 35098
525255	NZ_GG666321.1	Anaerococcus tetradius ATCC 35098
525255	NZ_GG666322.1	Anaerococcus tetradius ATCC 35098
525255	NZ_GG666323.1	Anaerococcus tetradius ATCC 35098
525255	NZ_GG666324.1	Anaerococcus tetradius ATCC 35098
525255	NZ_GG666325.1	Anaerococcus tetradius ATCC 35098
525255	NZ_GG666326.1	Anaerococcus tetradius ATCC 35098
525255	NZ_GG666327.1	Anaerococcus tetradius ATCC 35098
525255	NZ_GG666328.1	Anaerococcus tetradius ATCC 35098
525255	NZ_GG666329.1	Anaerococcus tetradius ATCC 35098
525255	NZ_GG666330.1	Anaerococcus tetradius ATCC 35098
525255	NZ_GG666331.1	Anaerococcus tetradius ATCC 35098
525255	NZ_GG666332.1	Anaerococcus tetradius ATCC 35098
525255	NZ_GG666333.1	Anaerococcus tetradius ATCC 35098
525255	NZ_GG666334.1	Anaerococcus tetradius ATCC 35098
525255	NZ_GG666335.1	Anaerococcus tetradius ATCC 35098
525255	NZ_GG666336.1	Anaerococcus tetradius ATCC 35098
525255	NZ_GG666337.1	Anaerococcus tetradius ATCC 35098
525255	NZ_GG666338.1	Anaerococcus tetradius ATCC 35098
525255	NZ_GG666339.1	Anaerococcus tetradius ATCC 35098
525255	NZ_GG666340.1	Anaerococcus tetradius ATCC 35098
525255	NZ_GG666341.1	Anaerococcus tetradius ATCC 35098
525255	NZ_GG666342.1	Anaerococcus tetradius ATCC 35098
525255	NZ_GG666343.1	Anaerococcus tetradius ATCC 35098
525255	NZ_GG666344.1	Anaerococcus tetradius ATCC 35098
525255	NZ_GG666345.1	Anaerococcus tetradius ATCC 35098
525255	NZ_GG666346.1	Anaerococcus tetradius ATCC 35098
525255	NZ_GG666347.1	Anaerococcus tetradius ATCC 35098
525255	NZ_GG666348.1	Anaerococcus tetradius ATCC 35098
525255	NZ_GG666349.1	Anaerococcus tetradius ATCC 35098
525255	NZ_GG666350.1	Anaerococcus tetradius ATCC 35098
525255	NZ_GG666351.1	Anaerococcus tetradius ATCC 35098
525255	NZ_GG666352.1	Anaerococcus tetradius ATCC 35098
525255	NZ_GG666353.1	Anaerococcus tetradius ATCC 35098
525255	NZ_GG666354.1	Anaerococcus tetradius ATCC 35098
525255	NZ_GG666355.1	Anaerococcus tetradius ATCC 35098
525255	NZ_GG666356.1	Anaerococcus tetradius ATCC 35098
525255	NZ_GG666357.1	Anaerococcus tetradius ATCC 35098
525255	NZ_GG666358.1	Anaerococcus tetradius ATCC 35098
525255	NZ_GG666359.1	Anaerococcus tetradius ATCC 35098
525255	NZ_GG666360.1	Anaerococcus tetradius ATCC 35098
525255	NZ_GG666361.1	Anaerococcus tetradius ATCC 35098
525255	NZ_GG666362.1	Anaerococcus tetradius ATCC 35098
525255	NZ_GG666363.1	Anaerococcus tetradius ATCC 35098
525255	NZ_GG666364.1	Anaerococcus tetradius ATCC 35098
525255	NZ_GG666365.1	Anaerococcus tetradius ATCC 35098
525255	NZ_GG666366.1	Anaerococcus tetradius ATCC 35098
525255	NZ_GG666367.1	Anaerococcus tetradius ATCC 35098
525255	NZ_GG666368.1	Anaerococcus tetradius ATCC 35098
525255	NZ_GG666369.1	Anaerococcus tetradius ATCC 35098
525255	NZ_GG666370.1	Anaerococcus tetradius ATCC 35098
525255	NZ_GG666371.1	Anaerococcus tetradius ATCC 35098
525255	NZ_GG666372.1	Anaerococcus tetradius ATCC 35098
525255	NZ_GG666373.1	Anaerococcus tetradius ATCC 35098
525255	NZ_GG666374.1	Anaerococcus tetradius ATCC 35098
525255	NZ_GG666375.1	Anaerococcus tetradius ATCC 35098
525255	NZ_GG666376.1	Anaerococcus tetradius ATCC 35098
525255	NZ_GG666377.1	Anaerococcus tetradius ATCC 35098
525255	NZ_GG666378.1	Anaerococcus tetradius ATCC 35098
525255	NZ_GG666379.1	Anaerococcus tetradius ATCC 35098
525255	NZ_GG666380.1	Anaerococcus tetradius ATCC 35098
525255	NZ_GG666381.1	Anaerococcus tetradius ATCC 35098
525255	NZ_GG666382.1	Anaerococcus tetradius ATCC 35098
525255	NZ_GG666383.1	Anaerococcus tetradius ATCC 35098
525255	NZ_GG666384.1	Anaerococcus tetradius ATCC 35098
525255	NZ_GG666385.1	Anaerococcus tetradius ATCC 35098
525255	NZ_GG666386.1	Anaerococcus tetradius ATCC 35098
525255	NZ_GG666387.1	Anaerococcus tetradius ATCC 35098
525255	NZ_GG666388.1	Anaerococcus tetradius ATCC 35098
525255	NZ_GG666389.1	Anaerococcus tetradius ATCC 35098
525255	NZ_GG666390.1	Anaerococcus tetradius ATCC 35098
525255	NZ_GG666391.1	Anaerococcus tetradius ATCC 35098
525255	NZ_GG666392.1	Anaerococcus tetradius ATCC 35098
525255	NZ_GG666393.1	Anaerococcus tetradius ATCC 35098
525255	NZ_GG666394.1	Anaerococcus tetradius ATCC 35098
655811	NZ_GG700527.1	Anaerococcus vaginalis ATCC 51170
655811	NZ_GG700528.1	Anaerococcus vaginalis ATCC 51170
655811	NZ_GG700529.1	Anaerococcus vaginalis ATCC 51170
655811	NZ_GG700530.1	Anaerococcus vaginalis ATCC 51170
655811	NZ_GG700531.1	Anaerococcus vaginalis ATCC 51170
655811	NZ_GG700532.1	Anaerococcus vaginalis ATCC 51170
445971	NZ_DS560015.1	Anaerofustis stercorihominis DSM 17244
445971	NZ_DS560016.1	Anaerofustis stercorihominis DSM 17244
445971	NZ_DS560017.1	Anaerofustis stercorihominis DSM 17244
445971	NZ_DS560018.1	Anaerofustis stercorihominis DSM 17244
445971	NZ_DS560019.1	Anaerofustis stercorihominis DSM 17244
455488	NC_011891.1	Anaeromyxobacter dehalogenans 2CP-1
290397	NC_007760.1	Anaeromyxobacter dehalogenans 2CP-C
404589	NC_009675.1	Anaeromyxobacter sp. Fw109-5
447217	NC_011145.1	Anaeromyxobacter sp. K
411490	NZ_DS499719.1	Anaerostipes caccae DSM 14662
411490	NZ_DS499720.1	Anaerostipes caccae DSM 14662
411490	NZ_DS499721.1	Anaerostipes caccae DSM 14662
411490	NZ_DS499722.1	Anaerostipes caccae DSM 14662
411490	NZ_DS499723.1	Anaerostipes caccae DSM 14662
411490	NZ_DS499724.1	Anaerostipes caccae DSM 14662
411490	NZ_DS499725.1	Anaerostipes caccae DSM 14662
411490	NZ_DS499726.1	Anaerostipes caccae DSM 14662
411490	NZ_DS499727.1	Anaerostipes caccae DSM 14662
411490	NZ_DS499728.1	Anaerostipes caccae DSM 14662
411490	NZ_DS499729.1	Anaerostipes caccae DSM 14662
411490	NZ_DS499730.1	Anaerostipes caccae DSM 14662
411490	NZ_DS499731.1	Anaerostipes caccae DSM 14662
411490	NZ_DS499732.1	Anaerostipes caccae DSM 14662
411490	NZ_DS499733.1	Anaerostipes caccae DSM 14662
411490	NZ_DS499734.1	Anaerostipes caccae DSM 14662
411490	NZ_DS499735.1	Anaerostipes caccae DSM 14662
411490	NZ_DS499736.1	Anaerostipes caccae DSM 14662
411490	NZ_DS499737.1	Anaerostipes caccae DSM 14662
411490	NZ_DS499738.1	Anaerostipes caccae DSM 14662
411490	NZ_DS499739.1	Anaerostipes caccae DSM 14662
411490	NZ_DS499740.1	Anaerostipes caccae DSM 14662
411490	NZ_DS499741.1	Anaerostipes caccae DSM 14662
411490	NZ_DS499742.1	Anaerostipes caccae DSM 14662
411490	NZ_DS499743.1	Anaerostipes caccae DSM 14662
411490	NZ_DS499744.1	Anaerostipes caccae DSM 14662
445972	NZ_DS544167.1	Anaerotruncus colihominis DSM 17241
445972	NZ_DS544168.1	Anaerotruncus colihominis DSM 17241
445972	NZ_DS544169.1	Anaerotruncus colihominis DSM 17241
445972	NZ_DS544170.1	Anaerotruncus colihominis DSM 17241
445972	NZ_DS544171.1	Anaerotruncus colihominis DSM 17241
445972	NZ_DS544172.1	Anaerotruncus colihominis DSM 17241
445972	NZ_DS544173.1	Anaerotruncus colihominis DSM 17241
445972	NZ_DS544174.1	Anaerotruncus colihominis DSM 17241
445972	NZ_DS544175.1	Anaerotruncus colihominis DSM 17241
445972	NZ_DS544176.1	Anaerotruncus colihominis DSM 17241
445972	NZ_DS544177.1	Anaerotruncus colihominis DSM 17241
445972	NZ_DS544178.1	Anaerotruncus colihominis DSM 17241
445972	NZ_DS544179.1	Anaerotruncus colihominis DSM 17241
445972	NZ_DS544180.1	Anaerotruncus colihominis DSM 17241
445972	NZ_DS544181.1	Anaerotruncus colihominis DSM 17241
445972	NZ_DS544182.1	Anaerotruncus colihominis DSM 17241
445972	NZ_DS544183.1	Anaerotruncus colihominis DSM 17241
445972	NZ_DS544184.1	Anaerotruncus colihominis DSM 17241
445972	NZ_DS544185.1	Anaerotruncus colihominis DSM 17241
445972	NZ_DS544186.1	Anaerotruncus colihominis DSM 17241
445972	NZ_DS544187.1	Anaerotruncus colihominis DSM 17241
445972	NZ_DS544188.1	Anaerotruncus colihominis DSM 17241
445972	NZ_DS544189.1	Anaerotruncus colihominis DSM 17241
445972	NZ_DS544190.1	Anaerotruncus colihominis DSM 17241
445972	NZ_DS544191.1	Anaerotruncus colihominis DSM 17241
445972	NZ_DS544192.1	Anaerotruncus colihominis DSM 17241
445972	NZ_DS544193.1	Anaerotruncus colihominis DSM 17241
445972	NZ_DS544194.1	Anaerotruncus colihominis DSM 17241
574556	NC_013532.1	Anaplasma centrale str. Israel
320483	NC_012026.1	Anaplasma marginale str. Florida
234826	NC_004842.2	Anaplasma marginale str. St. Maries
212042	NC_007797.1	Anaplasma phagocytophilum HZ
491915	NC_011567.1	Anoxybacillus flavithermus WK1
224324	NC_000918.1	Aquifex aeolicus VF5
224325	NC_000917.1	Archaeoglobus fulgidus DSM 4304
572546	NC_013741.1	Archaeoglobus profundus DSM 5631
367737	NC_009850.1	Arcobacter butzleri RM4018
76114	NC_006513.1	Aromatoleum aromaticum EbN1
290340	NC_008711.1	Arthrobacter aurescens TC1
452863	NC_011886.1	Arthrobacter chlorophenolicus A6
290399	NC_008541.1	Arthrobacter sp. FB24
322098	NC_007716.1	Aster yellows witches'-broom phytoplasma AYWB
521095	NC_013203.1	Atopobium parvulum DSM 20469
287752	NZ_CH672387.1	Aurantimonas manganoxydans SI85-9A1
62928	NC_008702.1	Azoarcus sp. BH72
438753	NC_009937.1	Azorhizobium caulinodans ORS 571
137722	NC_013854.1	Azospirillum sp. B510
322710	NC_012560.1	Azotobacter vinelandii DJ
326423	NC_009725.1	Bacillus amyloliquefaciens FZB42
668336	NC_013416.1	Bacillus anthracis
261594	NC_007530.2	Bacillus anthracis str. 'Ames Ancestor'
592021	NC_012659.1	Bacillus anthracis str. A0248
198094	NC_003997.3	Bacillus anthracis str. Ames
568206	NC_012581.1	Bacillus anthracis str. CDC 684
260799	NC_005945.1	Bacillus anthracis str. Sterne
572264	NC_012472.1	Bacillus cereus 03BB102
526967	NZ_CM000717.1	Bacillus cereus 172560W
526979	NZ_CM000727.1	Bacillus cereus 95/8201
526992	NZ_CM000739.1	Bacillus cereus AH1271
526993	NZ_CM000740.1	Bacillus cereus AH1272
526994	NZ_CM000741.1	Bacillus cereus AH1273
405534	NC_011658.1	Bacillus cereus AH187
526990	NZ_CM000737.1	Bacillus cereus AH603
526972	NZ_CM000719.1	Bacillus cereus AH621
526991	NZ_CM000738.1	Bacillus cereus AH676
405535	NC_011773.1	Bacillus cereus AH820
526980	NZ_CM000715.1	Bacillus cereus ATCC 10876
222523	NC_003909.8	Bacillus cereus ATCC 10987
226900	NC_004722.1	Bacillus cereus ATCC 14579
526977	NZ_CM000721.1	Bacillus cereus ATCC 4342
405532	NC_011725.1	Bacillus cereus B4264
526978	NZ_CM000726.1	Bacillus cereus BDRD-Cer4
526976	NZ_CM000725.1	Bacillus cereus BDRD-ST196
526974	NZ_CM000723.1	Bacillus cereus BDRD-ST24
526975	NZ_CM000724.1	Bacillus cereus BDRD-ST26
526970	NZ_CM000716.1	Bacillus cereus BGSC 6E1
288681	NC_006274.1	Bacillus cereus E33L
526989	NZ_CM000736.1	Bacillus cereus F65185
405531	NC_011772.1	Bacillus cereus G9842
526971	NZ_CM000718.1	Bacillus cereus MM3
361100	NC_011969.1	Bacillus cereus Q1
526968	NZ_CM000720.1	Bacillus cereus R309803
526982	NZ_CM000729.1	Bacillus cereus Rock1-15
526981	NZ_CM000728.1	Bacillus cereus Rock1-3
526983	NZ_CM000730.1	Bacillus cereus Rock3-28
526984	NZ_CM000731.1	Bacillus cereus Rock3-29
526985	NZ_CM000732.1	Bacillus cereus Rock3-42
526986	NZ_CM000733.1	Bacillus cereus Rock3-44
526988	NZ_CM000735.1	Bacillus cereus Rock4-18
526987	NZ_CM000734.1	Bacillus cereus Rock4-2
526973	NZ_CM000714.1	Bacillus cereus m1293
526969	NZ_CM000722.1	Bacillus cereus m1550
66692	NC_006582.1	Bacillus clausii KSM-K16
315749	NC_009674.1	Bacillus cytotoxicus NVH 391-98
272558	NC_002570.2	Bacillus halodurans C-125
279010	NC_006270.3	Bacillus licheniformis ATCC 14580
279010	NC_006322.1	Bacillus licheniformis ATCC 14580
526997	NZ_CM000742.1	Bacillus mycoides DSM 2048
526998	NZ_CM000743.1	Bacillus mycoides Rock1-4
526999	NZ_CM000744.1	Bacillus mycoides Rock3-17
527000	NZ_CM000745.1	Bacillus pseudomycoides DSM 12442
315750	NC_009848.1	Bacillus pumilus SAFR-032
313627	NZ_CH672355.1	Bacillus sp. NRRL B-14911
313627	NZ_CH672356.1	Bacillus sp. NRRL B-14911
313627	NZ_CH672357.1	Bacillus sp. NRRL B-14911
313627	NZ_CH672358.1	Bacillus sp. NRRL B-14911
313627	NZ_CH672359.1	Bacillus sp. NRRL B-14911
313627	NZ_CH672360.1	Bacillus sp. NRRL B-14911
313627	NZ_CH672361.1	Bacillus sp. NRRL B-14911
313627	NZ_CH672362.1	Bacillus sp. NRRL B-14911
313627	NZ_CH672363.1	Bacillus sp. NRRL B-14911
313627	NZ_CH672364.1	Bacillus sp. NRRL B-14911
313627	NZ_CH672365.1	Bacillus sp. NRRL B-14911
313627	NZ_CH672366.1	Bacillus sp. NRRL B-14911
313627	NZ_CH672367.1	Bacillus sp. NRRL B-14911
313627	NZ_CH672368.1	Bacillus sp. NRRL B-14911
313627	NZ_CH672369.1	Bacillus sp. NRRL B-14911
313627	NZ_CH672370.1	Bacillus sp. NRRL B-14911
313627	NZ_CH672371.1	Bacillus sp. NRRL B-14911
313627	NZ_CH672372.1	Bacillus sp. NRRL B-14911
224308	NZ_CM000487.1	Bacillus subtilis subsp. subtilis str. 168
224308	NC_000964.3	Bacillus subtilis subsp. subtilis str. 168
535025	NZ_CM000489.1	Bacillus subtilis subsp. subtilis str. JH642
535026	NZ_CM000488.1	Bacillus subtilis subsp. subtilis str. NCIB 3610
535024	NZ_CM000490.1	Bacillus subtilis subsp. subtilis str. SMY
527021	NZ_CM000747.1	Bacillus thuringiensis Bt407
527019	NZ_CM000758.1	Bacillus thuringiensis IBL 200
527020	NZ_CM000759.1	Bacillus thuringiensis IBL 4222
527032	NZ_CM000754.1	Bacillus thuringiensis serovar andalousiensis BGSC 4AW1
527031	NZ_CM000753.1	Bacillus thuringiensis serovar berliner ATCC 10792
527030	NZ_CM000756.1	Bacillus thuringiensis serovar huazhongensis BGSC 4BD1
281309	NC_005957.1	Bacillus thuringiensis serovar konkukian str. 97-27
527023	NZ_CM000751.1	Bacillus thuringiensis serovar kurstaki str. T03a001
527022	NZ_CM000752.1	Bacillus thuringiensis serovar monterrey BGSC 4AJ1
527027	NZ_CM000750.1	Bacillus thuringiensis serovar pakistani str. T13001
527029	NZ_CM000755.1	Bacillus thuringiensis serovar pondicheriensis BGSC 4BA1
527028	NZ_CM000757.1	Bacillus thuringiensis serovar pulsiensis BGSC 4CC1
527026	NZ_CM000749.1	Bacillus thuringiensis serovar sotto str. T04001
527025	NZ_CM000748.1	Bacillus thuringiensis serovar thuringiensis str. T01001
527024	NZ_CM000746.1	Bacillus thuringiensis serovar tochigiensis BGSC 4Y1
412694	NC_008600.1	Bacillus thuringiensis str. Al Hakam
315730	NC_010184.1	Bacillus weihenstephanensis KBAB4
537012	NZ_EQ973486.1	Bacteroides cellulosilyticus DSM 14838
537012	NZ_EQ973487.1	Bacteroides cellulosilyticus DSM 14838
537012	NZ_EQ973488.1	Bacteroides cellulosilyticus DSM 14838
537012	NZ_EQ973489.1	Bacteroides cellulosilyticus DSM 14838
537012	NZ_EQ973490.1	Bacteroides cellulosilyticus DSM 14838
537012	NZ_EQ973491.1	Bacteroides cellulosilyticus DSM 14838
537012	NZ_EQ973492.1	Bacteroides cellulosilyticus DSM 14838
537012	NZ_EQ973493.1	Bacteroides cellulosilyticus DSM 14838
537012	NZ_EQ973494.1	Bacteroides cellulosilyticus DSM 14838
537012	NZ_EQ973495.1	Bacteroides cellulosilyticus DSM 14838
537012	NZ_EQ973496.1	Bacteroides cellulosilyticus DSM 14838
537012	NZ_EQ973497.1	Bacteroides cellulosilyticus DSM 14838
537012	NZ_EQ973498.1	Bacteroides cellulosilyticus DSM 14838
537012	NZ_EQ973499.1	Bacteroides cellulosilyticus DSM 14838
537012	NZ_EQ973500.1	Bacteroides cellulosilyticus DSM 14838
537012	NZ_EQ973501.1	Bacteroides cellulosilyticus DSM 14838
537012	NZ_EQ973502.1	Bacteroides cellulosilyticus DSM 14838
537012	NZ_EQ973503.1	Bacteroides cellulosilyticus DSM 14838
537012	NZ_EQ973504.1	Bacteroides cellulosilyticus DSM 14838
537012	NZ_EQ973505.1	Bacteroides cellulosilyticus DSM 14838
537012	NZ_EQ973506.1	Bacteroides cellulosilyticus DSM 14838
537012	NZ_EQ973507.1	Bacteroides cellulosilyticus DSM 14838
537012	NZ_EQ973508.1	Bacteroides cellulosilyticus DSM 14838
537012	NZ_EQ973509.1	Bacteroides cellulosilyticus DSM 14838
537012	NZ_EQ973510.1	Bacteroides cellulosilyticus DSM 14838
537012	NZ_EQ973511.1	Bacteroides cellulosilyticus DSM 14838
537012	NZ_EQ973512.1	Bacteroides cellulosilyticus DSM 14838
537012	NZ_EQ973513.1	Bacteroides cellulosilyticus DSM 14838
537012	NZ_EQ973514.1	Bacteroides cellulosilyticus DSM 14838
537012	NZ_EQ973515.1	Bacteroides cellulosilyticus DSM 14838
537012	NZ_EQ973516.1	Bacteroides cellulosilyticus DSM 14838
537012	NZ_EQ973517.1	Bacteroides cellulosilyticus DSM 14838
537012	NZ_EQ973518.1	Bacteroides cellulosilyticus DSM 14838
537012	NZ_EQ973519.1	Bacteroides cellulosilyticus DSM 14838
537012	NZ_EQ973520.1	Bacteroides cellulosilyticus DSM 14838
537012	NZ_EQ973521.1	Bacteroides cellulosilyticus DSM 14838
537012	NZ_EQ973522.1	Bacteroides cellulosilyticus DSM 14838
537012	NZ_EQ973523.1	Bacteroides cellulosilyticus DSM 14838
537012	NZ_EQ973524.1	Bacteroides cellulosilyticus DSM 14838
537012	NZ_EQ973525.1	Bacteroides cellulosilyticus DSM 14838
537012	NZ_EQ973526.1	Bacteroides cellulosilyticus DSM 14838
537012	NZ_EQ973527.1	Bacteroides cellulosilyticus DSM 14838
537012	NZ_EQ973528.1	Bacteroides cellulosilyticus DSM 14838
537012	NZ_EQ973529.1	Bacteroides cellulosilyticus DSM 14838
537012	NZ_EQ973530.1	Bacteroides cellulosilyticus DSM 14838
537012	NZ_EQ973531.1	Bacteroides cellulosilyticus DSM 14838
537012	NZ_EQ973532.1	Bacteroides cellulosilyticus DSM 14838
537012	NZ_EQ973533.1	Bacteroides cellulosilyticus DSM 14838
537012	NZ_EQ973534.1	Bacteroides cellulosilyticus DSM 14838
537012	NZ_EQ973535.1	Bacteroides cellulosilyticus DSM 14838
537012	NZ_EQ973536.1	Bacteroides cellulosilyticus DSM 14838
537012	NZ_EQ973537.1	Bacteroides cellulosilyticus DSM 14838
537012	NZ_EQ973538.1	Bacteroides cellulosilyticus DSM 14838
537012	NZ_EQ973539.1	Bacteroides cellulosilyticus DSM 14838
537012	NZ_EQ973540.1	Bacteroides cellulosilyticus DSM 14838
537012	NZ_EQ973541.1	Bacteroides cellulosilyticus DSM 14838
537012	NZ_EQ973542.1	Bacteroides cellulosilyticus DSM 14838
537012	NZ_EQ973543.1	Bacteroides cellulosilyticus DSM 14838
537012	NZ_EQ973544.1	Bacteroides cellulosilyticus DSM 14838
537012	NZ_EQ973545.1	Bacteroides cellulosilyticus DSM 14838
537012	NZ_EQ973546.1	Bacteroides cellulosilyticus DSM 14838
537012	NZ_EQ973547.1	Bacteroides cellulosilyticus DSM 14838
537012	NZ_EQ973548.1	Bacteroides cellulosilyticus DSM 14838
537012	NZ_EQ973549.1	Bacteroides cellulosilyticus DSM 14838
537012	NZ_EQ973550.1	Bacteroides cellulosilyticus DSM 14838
537012	NZ_EQ973551.1	Bacteroides cellulosilyticus DSM 14838
470145	NZ_DS981427.1	Bacteroides coprocola DSM 17136
470145	NZ_DS981428.1	Bacteroides coprocola DSM 17136
470145	NZ_DS981429.1	Bacteroides coprocola DSM 17136
470145	NZ_DS981430.1	Bacteroides coprocola DSM 17136
470145	NZ_DS981431.1	Bacteroides coprocola DSM 17136
470145	NZ_DS981432.1	Bacteroides coprocola DSM 17136
470145	NZ_DS981433.1	Bacteroides coprocola DSM 17136
470145	NZ_DS981434.1	Bacteroides coprocola DSM 17136
470145	NZ_DS981435.1	Bacteroides coprocola DSM 17136
470145	NZ_DS981436.1	Bacteroides coprocola DSM 17136
470145	NZ_DS981437.1	Bacteroides coprocola DSM 17136
470145	NZ_DS981438.1	Bacteroides coprocola DSM 17136
470145	NZ_DS981439.1	Bacteroides coprocola DSM 17136
470145	NZ_DS981440.1	Bacteroides coprocola DSM 17136
470145	NZ_DS981441.1	Bacteroides coprocola DSM 17136
470145	NZ_DS981442.1	Bacteroides coprocola DSM 17136
470145	NZ_DS981443.1	Bacteroides coprocola DSM 17136
470145	NZ_DS981444.1	Bacteroides coprocola DSM 17136
470145	NZ_DS981445.1	Bacteroides coprocola DSM 17136
470145	NZ_DS981446.1	Bacteroides coprocola DSM 17136
470145	NZ_DS981447.1	Bacteroides coprocola DSM 17136
470145	NZ_DS981448.1	Bacteroides coprocola DSM 17136
470145	NZ_DS981449.1	Bacteroides coprocola DSM 17136
470145	NZ_DS981450.1	Bacteroides coprocola DSM 17136
470145	NZ_DS981451.1	Bacteroides coprocola DSM 17136
470145	NZ_DS981452.1	Bacteroides coprocola DSM 17136
470145	NZ_DS981453.1	Bacteroides coprocola DSM 17136
470145	NZ_DS981454.1	Bacteroides coprocola DSM 17136
470145	NZ_DS981455.1	Bacteroides coprocola DSM 17136
470145	NZ_DS981456.1	Bacteroides coprocola DSM 17136
470145	NZ_DS981457.1	Bacteroides coprocola DSM 17136
470145	NZ_DS981458.1	Bacteroides coprocola DSM 17136
470145	NZ_DS981459.1	Bacteroides coprocola DSM 17136
470145	NZ_DS981460.1	Bacteroides coprocola DSM 17136
470145	NZ_DS981461.1	Bacteroides coprocola DSM 17136
470145	NZ_DS981462.1	Bacteroides coprocola DSM 17136
470145	NZ_DS981463.1	Bacteroides coprocola DSM 17136
470145	NZ_DS981464.1	Bacteroides coprocola DSM 17136
470145	NZ_DS981465.1	Bacteroides coprocola DSM 17136
470145	NZ_DS981466.1	Bacteroides coprocola DSM 17136
470145	NZ_DS981467.1	Bacteroides coprocola DSM 17136
470145	NZ_DS981468.1	Bacteroides coprocola DSM 17136
470145	NZ_DS981469.1	Bacteroides coprocola DSM 17136
470145	NZ_DS981470.1	Bacteroides coprocola DSM 17136
470145	NZ_DS981471.1	Bacteroides coprocola DSM 17136
470145	NZ_DS981472.1	Bacteroides coprocola DSM 17136
470145	NZ_DS981473.1	Bacteroides coprocola DSM 17136
470145	NZ_DS981474.1	Bacteroides coprocola DSM 17136
470145	NZ_DS981475.1	Bacteroides coprocola DSM 17136
470145	NZ_DS981476.1	Bacteroides coprocola DSM 17136
470145	NZ_DS981477.1	Bacteroides coprocola DSM 17136
470145	NZ_DS981478.1	Bacteroides coprocola DSM 17136
470145	NZ_DS981479.1	Bacteroides coprocola DSM 17136
470145	NZ_DS981480.1	Bacteroides coprocola DSM 17136
470145	NZ_DS981481.1	Bacteroides coprocola DSM 17136
470145	NZ_DS981482.1	Bacteroides coprocola DSM 17136
470145	NZ_DS981483.1	Bacteroides coprocola DSM 17136
470145	NZ_DS981484.1	Bacteroides coprocola DSM 17136
470145	NZ_DS981485.1	Bacteroides coprocola DSM 17136
470145	NZ_DS981486.1	Bacteroides coprocola DSM 17136
470145	NZ_DS981487.1	Bacteroides coprocola DSM 17136
470145	NZ_DS981488.1	Bacteroides coprocola DSM 17136
470145	NZ_DS981489.1	Bacteroides coprocola DSM 17136
470145	NZ_DS981490.1	Bacteroides coprocola DSM 17136
470145	NZ_DS981491.1	Bacteroides coprocola DSM 17136
470145	NZ_DS981492.1	Bacteroides coprocola DSM 17136
470145	NZ_DS981493.1	Bacteroides coprocola DSM 17136
470145	NZ_DS981494.1	Bacteroides coprocola DSM 17136
470145	NZ_DS981495.1	Bacteroides coprocola DSM 17136
470145	NZ_DS981496.1	Bacteroides coprocola DSM 17136
470145	NZ_DS981497.1	Bacteroides coprocola DSM 17136
470145	NZ_DS981498.1	Bacteroides coprocola DSM 17136
470145	NZ_DS981499.1	Bacteroides coprocola DSM 17136
470145	NZ_DS981500.1	Bacteroides coprocola DSM 17136
470145	NZ_DS981501.1	Bacteroides coprocola DSM 17136
470145	NZ_DS981502.1	Bacteroides coprocola DSM 17136
470145	NZ_DS981503.1	Bacteroides coprocola DSM 17136
470145	NZ_DS981504.1	Bacteroides coprocola DSM 17136
470145	NZ_DS981505.1	Bacteroides coprocola DSM 17136
470145	NZ_DS981506.1	Bacteroides coprocola DSM 17136
470145	NZ_DS981507.1	Bacteroides coprocola DSM 17136
470145	NZ_DS981508.1	Bacteroides coprocola DSM 17136
470145	NZ_DS981509.1	Bacteroides coprocola DSM 17136
470145	NZ_DS981510.1	Bacteroides coprocola DSM 17136
470145	NZ_DS981511.1	Bacteroides coprocola DSM 17136
470145	NZ_DS981512.1	Bacteroides coprocola DSM 17136
470145	NZ_DS981513.1	Bacteroides coprocola DSM 17136
470145	NZ_DS981514.1	Bacteroides coprocola DSM 17136
470145	NZ_DS981515.1	Bacteroides coprocola DSM 17136
470145	NZ_DS981516.1	Bacteroides coprocola DSM 17136
547042	NZ_EQ973628.1	Bacteroides coprophilus DSM 18228
547042	NZ_EQ973629.1	Bacteroides coprophilus DSM 18228
547042	NZ_EQ973630.1	Bacteroides coprophilus DSM 18228
547042	NZ_EQ973631.1	Bacteroides coprophilus DSM 18228
547042	NZ_EQ973632.1	Bacteroides coprophilus DSM 18228
547042	NZ_EQ973633.1	Bacteroides coprophilus DSM 18228
547042	NZ_EQ973634.1	Bacteroides coprophilus DSM 18228
547042	NZ_EQ973635.1	Bacteroides coprophilus DSM 18228
547042	NZ_EQ973636.1	Bacteroides coprophilus DSM 18228
547042	NZ_EQ973637.1	Bacteroides coprophilus DSM 18228
547042	NZ_EQ973638.1	Bacteroides coprophilus DSM 18228
547042	NZ_EQ973639.1	Bacteroides coprophilus DSM 18228
547042	NZ_EQ973640.1	Bacteroides coprophilus DSM 18228
547042	NZ_EQ973641.1	Bacteroides coprophilus DSM 18228
547042	NZ_EQ973642.1	Bacteroides coprophilus DSM 18228
547042	NZ_EQ973643.1	Bacteroides coprophilus DSM 18228
547042	NZ_EQ973644.1	Bacteroides coprophilus DSM 18228
547042	NZ_EQ973645.1	Bacteroides coprophilus DSM 18228
547042	NZ_EQ973646.1	Bacteroides coprophilus DSM 18228
547042	NZ_EQ973647.1	Bacteroides coprophilus DSM 18228
547042	NZ_EQ973648.1	Bacteroides coprophilus DSM 18228
547042	NZ_EQ973649.1	Bacteroides coprophilus DSM 18228
547042	NZ_EQ973650.1	Bacteroides coprophilus DSM 18228
547042	NZ_EQ973651.1	Bacteroides coprophilus DSM 18228
547042	NZ_EQ973652.1	Bacteroides coprophilus DSM 18228
547042	NZ_EQ973653.1	Bacteroides coprophilus DSM 18228
547042	NZ_EQ973654.1	Bacteroides coprophilus DSM 18228
547042	NZ_EQ973655.1	Bacteroides coprophilus DSM 18228
547042	NZ_EQ973656.1	Bacteroides coprophilus DSM 18228
547042	NZ_EQ973657.1	Bacteroides coprophilus DSM 18228
547042	NZ_EQ973658.1	Bacteroides coprophilus DSM 18228
547042	NZ_EQ973659.1	Bacteroides coprophilus DSM 18228
547042	NZ_EQ973660.1	Bacteroides coprophilus DSM 18228
547042	NZ_EQ973661.1	Bacteroides coprophilus DSM 18228
547042	NZ_EQ973662.1	Bacteroides coprophilus DSM 18228
547042	NZ_EQ973663.1	Bacteroides coprophilus DSM 18228
547042	NZ_EQ973664.1	Bacteroides coprophilus DSM 18228
547042	NZ_EQ973665.1	Bacteroides coprophilus DSM 18228
547042	NZ_EQ973666.1	Bacteroides coprophilus DSM 18228
547042	NZ_EQ973667.1	Bacteroides coprophilus DSM 18228
547042	NZ_EQ973668.1	Bacteroides coprophilus DSM 18228
547042	NZ_EQ973669.1	Bacteroides coprophilus DSM 18228
547042	NZ_EQ973670.1	Bacteroides coprophilus DSM 18228
547042	NZ_EQ973671.1	Bacteroides coprophilus DSM 18228
547042	NZ_EQ973672.1	Bacteroides coprophilus DSM 18228
547042	NZ_EQ973673.1	Bacteroides coprophilus DSM 18228
547042	NZ_EQ973674.1	Bacteroides coprophilus DSM 18228
547042	NZ_EQ973675.1	Bacteroides coprophilus DSM 18228
547042	NZ_EQ973676.1	Bacteroides coprophilus DSM 18228
547042	NZ_EQ973677.1	Bacteroides coprophilus DSM 18228
547042	NZ_EQ973678.1	Bacteroides coprophilus DSM 18228
547042	NZ_EQ973679.1	Bacteroides coprophilus DSM 18228
547042	NZ_EQ973680.1	Bacteroides coprophilus DSM 18228
547042	NZ_EQ973681.1	Bacteroides coprophilus DSM 18228
547042	NZ_EQ973682.1	Bacteroides coprophilus DSM 18228
547042	NZ_EQ973683.1	Bacteroides coprophilus DSM 18228
547042	NZ_EQ973684.1	Bacteroides coprophilus DSM 18228
547042	NZ_EQ973685.1	Bacteroides coprophilus DSM 18228
547042	NZ_EQ973686.1	Bacteroides coprophilus DSM 18228
547042	NZ_EQ973687.1	Bacteroides coprophilus DSM 18228
547042	NZ_EQ973688.1	Bacteroides coprophilus DSM 18228
547042	NZ_EQ973689.1	Bacteroides coprophilus DSM 18228
547042	NZ_EQ973690.1	Bacteroides coprophilus DSM 18228
547042	NZ_EQ973691.1	Bacteroides coprophilus DSM 18228
547042	NZ_EQ973692.1	Bacteroides coprophilus DSM 18228
547042	NZ_EQ973693.1	Bacteroides coprophilus DSM 18228
547042	NZ_EQ973694.1	Bacteroides coprophilus DSM 18228
547042	NZ_EQ973695.1	Bacteroides coprophilus DSM 18228
547042	NZ_EQ973696.1	Bacteroides coprophilus DSM 18228
547042	NZ_EQ973697.1	Bacteroides coprophilus DSM 18228
547042	NZ_EQ973698.1	Bacteroides coprophilus DSM 18228
547042	NZ_EQ973699.1	Bacteroides coprophilus DSM 18228
547042	NZ_EQ973700.1	Bacteroides coprophilus DSM 18228
483217	NZ_DS995528.1	Bacteroides dorei DSM 17855
483217	NZ_DS995529.1	Bacteroides dorei DSM 17855
483217	NZ_DS995530.1	Bacteroides dorei DSM 17855
483217	NZ_DS995531.1	Bacteroides dorei DSM 17855
483217	NZ_DS995532.1	Bacteroides dorei DSM 17855
483217	NZ_DS995533.1	Bacteroides dorei DSM 17855
483217	NZ_DS995534.1	Bacteroides dorei DSM 17855
483217	NZ_DS995535.1	Bacteroides dorei DSM 17855
483217	NZ_DS995536.1	Bacteroides dorei DSM 17855
483217	NZ_DS995537.1	Bacteroides dorei DSM 17855
483217	NZ_DS995538.1	Bacteroides dorei DSM 17855
483217	NZ_DS995539.1	Bacteroides dorei DSM 17855
483217	NZ_DS995540.1	Bacteroides dorei DSM 17855
483217	NZ_DS995541.1	Bacteroides dorei DSM 17855
483217	NZ_DS995542.1	Bacteroides dorei DSM 17855
483217	NZ_DS995543.1	Bacteroides dorei DSM 17855
483217	NZ_DS995544.1	Bacteroides dorei DSM 17855
483217	NZ_DS995545.1	Bacteroides dorei DSM 17855
483217	NZ_DS995546.1	Bacteroides dorei DSM 17855
483217	NZ_DS995547.1	Bacteroides dorei DSM 17855
483217	NZ_DS995548.1	Bacteroides dorei DSM 17855
483217	NZ_DS995549.1	Bacteroides dorei DSM 17855
483217	NZ_DS995550.1	Bacteroides dorei DSM 17855
483217	NZ_DS995551.1	Bacteroides dorei DSM 17855
483217	NZ_DS995552.1	Bacteroides dorei DSM 17855
483217	NZ_DS995553.1	Bacteroides dorei DSM 17855
483217	NZ_DS995554.1	Bacteroides dorei DSM 17855
483217	NZ_DS995555.1	Bacteroides dorei DSM 17855
483217	NZ_DS995556.1	Bacteroides dorei DSM 17855
483217	NZ_DS995557.1	Bacteroides dorei DSM 17855
483217	NZ_DS995558.1	Bacteroides dorei DSM 17855
483217	NZ_DS995559.1	Bacteroides dorei DSM 17855
483217	NZ_DS995560.1	Bacteroides dorei DSM 17855
483217	NZ_DS995561.1	Bacteroides dorei DSM 17855
483217	NZ_DS995562.1	Bacteroides dorei DSM 17855
483217	NZ_DS995563.1	Bacteroides dorei DSM 17855
483217	NZ_DS995564.1	Bacteroides dorei DSM 17855
483217	NZ_DS995565.1	Bacteroides dorei DSM 17855
483217	NZ_DS995566.1	Bacteroides dorei DSM 17855
483217	NZ_DS995567.1	Bacteroides dorei DSM 17855
483216	NZ_DS995508.1	Bacteroides eggerthii DSM 20697
483216	NZ_DS995509.1	Bacteroides eggerthii DSM 20697
483216	NZ_DS995510.1	Bacteroides eggerthii DSM 20697
483216	NZ_DS995511.1	Bacteroides eggerthii DSM 20697
483216	NZ_DS995512.1	Bacteroides eggerthii DSM 20697
483216	NZ_DS995513.1	Bacteroides eggerthii DSM 20697
483216	NZ_DS995514.1	Bacteroides eggerthii DSM 20697
483216	NZ_DS995515.1	Bacteroides eggerthii DSM 20697
483216	NZ_DS995516.1	Bacteroides eggerthii DSM 20697
483216	NZ_DS995517.1	Bacteroides eggerthii DSM 20697
483216	NZ_DS995518.1	Bacteroides eggerthii DSM 20697
483216	NZ_DS995519.1	Bacteroides eggerthii DSM 20697
483216	NZ_DS995520.1	Bacteroides eggerthii DSM 20697
483216	NZ_DS995521.1	Bacteroides eggerthii DSM 20697
483216	NZ_DS995522.1	Bacteroides eggerthii DSM 20697
483216	NZ_DS995523.1	Bacteroides eggerthii DSM 20697
483216	NZ_DS995524.1	Bacteroides eggerthii DSM 20697
483216	NZ_DS995525.1	Bacteroides eggerthii DSM 20697
483216	NZ_DS995526.1	Bacteroides eggerthii DSM 20697
483216	NZ_DS995527.1	Bacteroides eggerthii DSM 20697
483215	NZ_GG688317.1	Bacteroides finegoldii DSM 17565
483215	NZ_GG688318.1	Bacteroides finegoldii DSM 17565
483215	NZ_GG688319.1	Bacteroides finegoldii DSM 17565
483215	NZ_GG688320.1	Bacteroides finegoldii DSM 17565
483215	NZ_GG688321.1	Bacteroides finegoldii DSM 17565
483215	NZ_GG688322.1	Bacteroides finegoldii DSM 17565
483215	NZ_GG688323.1	Bacteroides finegoldii DSM 17565
483215	NZ_GG688324.1	Bacteroides finegoldii DSM 17565
483215	NZ_GG688325.1	Bacteroides finegoldii DSM 17565
483215	NZ_GG688326.1	Bacteroides finegoldii DSM 17565
483215	NZ_GG688327.1	Bacteroides finegoldii DSM 17565
483215	NZ_GG688328.1	Bacteroides finegoldii DSM 17565
483215	NZ_GG688329.1	Bacteroides finegoldii DSM 17565
483215	NZ_GG688330.1	Bacteroides finegoldii DSM 17565
483215	NZ_GG688331.1	Bacteroides finegoldii DSM 17565
483215	NZ_GG688332.1	Bacteroides finegoldii DSM 17565
483215	NZ_GG688333.1	Bacteroides finegoldii DSM 17565
483215	NZ_GG688334.1	Bacteroides finegoldii DSM 17565
483215	NZ_GG688335.1	Bacteroides finegoldii DSM 17565
483215	NZ_GG688336.1	Bacteroides finegoldii DSM 17565
483215	NZ_GG688337.1	Bacteroides finegoldii DSM 17565
483215	NZ_GG688338.1	Bacteroides finegoldii DSM 17565
483215	NZ_GG688339.1	Bacteroides finegoldii DSM 17565
483215	NZ_GG688340.1	Bacteroides finegoldii DSM 17565
483215	NZ_GG688341.1	Bacteroides finegoldii DSM 17565
483215	NZ_GG688342.1	Bacteroides finegoldii DSM 17565
483215	NZ_GG688343.1	Bacteroides finegoldii DSM 17565
483215	NZ_GG688344.1	Bacteroides finegoldii DSM 17565
483215	NZ_GG688345.1	Bacteroides finegoldii DSM 17565
483215	NZ_GG688346.1	Bacteroides finegoldii DSM 17565
483215	NZ_GG688347.1	Bacteroides finegoldii DSM 17565
483215	NZ_GG688348.1	Bacteroides finegoldii DSM 17565
483215	NZ_GG688349.1	Bacteroides finegoldii DSM 17565
1428	NC_007202.1	Bacteroides fragilis
457424	NZ_EQ973213.1	Bacteroides fragilis 3_1_12
457424	NZ_EQ973214.1	Bacteroides fragilis 3_1_12
457424	NZ_EQ973215.1	Bacteroides fragilis 3_1_12
457424	NZ_EQ973216.1	Bacteroides fragilis 3_1_12
457424	NZ_EQ973217.1	Bacteroides fragilis 3_1_12
457424	NZ_EQ973218.1	Bacteroides fragilis 3_1_12
457424	NZ_EQ973219.1	Bacteroides fragilis 3_1_12
457424	NZ_EQ973220.1	Bacteroides fragilis 3_1_12
457424	NZ_EQ973221.1	Bacteroides fragilis 3_1_12
457424	NZ_EQ973222.1	Bacteroides fragilis 3_1_12
457424	NZ_EQ973223.1	Bacteroides fragilis 3_1_12
457424	NZ_EQ973224.1	Bacteroides fragilis 3_1_12
457424	NZ_EQ973225.1	Bacteroides fragilis 3_1_12
457424	NZ_EQ973226.1	Bacteroides fragilis 3_1_12
457424	NZ_EQ973227.1	Bacteroides fragilis 3_1_12
457424	NZ_EQ973228.1	Bacteroides fragilis 3_1_12
457424	NZ_EQ973229.1	Bacteroides fragilis 3_1_12
457424	NZ_EQ973230.1	Bacteroides fragilis 3_1_12
457424	NZ_EQ973231.1	Bacteroides fragilis 3_1_12
457424	NZ_EQ973232.1	Bacteroides fragilis 3_1_12
457424	NZ_EQ973233.1	Bacteroides fragilis 3_1_12
457424	NZ_EQ973234.1	Bacteroides fragilis 3_1_12
457424	NZ_EQ973235.1	Bacteroides fragilis 3_1_12
457424	NZ_EQ973236.1	Bacteroides fragilis 3_1_12
457424	NZ_EQ973237.1	Bacteroides fragilis 3_1_12
457424	NZ_EQ973238.1	Bacteroides fragilis 3_1_12
457424	NZ_EQ973239.1	Bacteroides fragilis 3_1_12
457424	NZ_EQ973240.1	Bacteroides fragilis 3_1_12
457424	NZ_EQ973241.1	Bacteroides fragilis 3_1_12
457424	NZ_EQ973242.1	Bacteroides fragilis 3_1_12
457424	NZ_EQ973243.1	Bacteroides fragilis 3_1_12
457424	NZ_EQ973244.1	Bacteroides fragilis 3_1_12
272559	NC_003228.3	Bacteroides fragilis NCTC 9343
295405	NC_006347.1	Bacteroides fragilis YCH46
411476	NZ_DS264553.1	Bacteroides ovatus ATCC 8483
411476	NZ_DS264554.1	Bacteroides ovatus ATCC 8483
411476	NZ_DS264555.1	Bacteroides ovatus ATCC 8483
411476	NZ_DS264556.1	Bacteroides ovatus ATCC 8483
411476	NZ_DS264557.1	Bacteroides ovatus ATCC 8483
411476	NZ_DS264558.1	Bacteroides ovatus ATCC 8483
411476	NZ_DS264559.1	Bacteroides ovatus ATCC 8483
411476	NZ_DS264560.1	Bacteroides ovatus ATCC 8483
411476	NZ_DS264561.1	Bacteroides ovatus ATCC 8483
411476	NZ_DS264562.1	Bacteroides ovatus ATCC 8483
411476	NZ_DS264563.1	Bacteroides ovatus ATCC 8483
411476	NZ_DS264564.1	Bacteroides ovatus ATCC 8483
411476	NZ_DS264565.1	Bacteroides ovatus ATCC 8483
411476	NZ_DS264566.1	Bacteroides ovatus ATCC 8483
411476	NZ_DS264567.1	Bacteroides ovatus ATCC 8483
411476	NZ_DS264568.1	Bacteroides ovatus ATCC 8483
411476	NZ_DS264569.1	Bacteroides ovatus ATCC 8483
411476	NZ_DS264570.1	Bacteroides ovatus ATCC 8483
411476	NZ_DS264571.1	Bacteroides ovatus ATCC 8483
411476	NZ_DS264572.1	Bacteroides ovatus ATCC 8483
411476	NZ_DS264573.1	Bacteroides ovatus ATCC 8483
411476	NZ_DS264574.1	Bacteroides ovatus ATCC 8483
411476	NZ_DS264575.1	Bacteroides ovatus ATCC 8483
411476	NZ_DS264576.1	Bacteroides ovatus ATCC 8483
411476	NZ_DS264577.1	Bacteroides ovatus ATCC 8483
411476	NZ_DS264578.1	Bacteroides ovatus ATCC 8483
411476	NZ_DS264579.1	Bacteroides ovatus ATCC 8483
411476	NZ_DS264580.1	Bacteroides ovatus ATCC 8483
411476	NZ_DS264581.1	Bacteroides ovatus ATCC 8483
411476	NZ_DS264582.1	Bacteroides ovatus ATCC 8483
411476	NZ_DS264583.1	Bacteroides ovatus ATCC 8483
411476	NZ_DS264584.1	Bacteroides ovatus ATCC 8483
484018	NZ_DS990117.1	Bacteroides plebeius DSM 17135
484018	NZ_DS990119.1	Bacteroides plebeius DSM 17135
484018	NZ_DS990121.1	Bacteroides plebeius DSM 17135
484018	NZ_DS990122.1	Bacteroides plebeius DSM 17135
484018	NZ_DS990123.1	Bacteroides plebeius DSM 17135
484018	NZ_DS990124.1	Bacteroides plebeius DSM 17135
484018	NZ_DS990125.1	Bacteroides plebeius DSM 17135
484018	NZ_DS990126.1	Bacteroides plebeius DSM 17135
484018	NZ_DS990127.1	Bacteroides plebeius DSM 17135
484018	NZ_DS990128.1	Bacteroides plebeius DSM 17135
484018	NZ_DS990129.1	Bacteroides plebeius DSM 17135
484018	NZ_DS990130.1	Bacteroides plebeius DSM 17135
484018	NZ_DS990131.1	Bacteroides plebeius DSM 17135
484018	NZ_DS990132.1	Bacteroides plebeius DSM 17135
484018	NZ_DS990133.1	Bacteroides plebeius DSM 17135
484018	NZ_DS990134.1	Bacteroides plebeius DSM 17135
484018	NZ_DS990135.1	Bacteroides plebeius DSM 17135
484018	NZ_DS990118.1	Bacteroides plebeius DSM 17135
469586	NZ_GG695899.1	Bacteroides sp. 1_1_6
469586	NZ_GG695900.1	Bacteroides sp. 1_1_6
469586	NZ_GG695901.1	Bacteroides sp. 1_1_6
469586	NZ_GG695902.1	Bacteroides sp. 1_1_6
469586	NZ_GG695903.1	Bacteroides sp. 1_1_6
469586	NZ_GG695904.1	Bacteroides sp. 1_1_6
469586	NZ_GG695905.1	Bacteroides sp. 1_1_6
469586	NZ_GG695906.1	Bacteroides sp. 1_1_6
469586	NZ_GG695907.1	Bacteroides sp. 1_1_6
469586	NZ_GG695908.1	Bacteroides sp. 1_1_6
469586	NZ_GG695909.1	Bacteroides sp. 1_1_6
469586	NZ_GG695910.1	Bacteroides sp. 1_1_6
469586	NZ_GG695911.1	Bacteroides sp. 1_1_6
469586	NZ_GG695912.1	Bacteroides sp. 1_1_6
469586	NZ_GG695913.1	Bacteroides sp. 1_1_6
469586	NZ_GG695914.1	Bacteroides sp. 1_1_6
469586	NZ_GG695915.1	Bacteroides sp. 1_1_6
469586	NZ_GG695916.1	Bacteroides sp. 1_1_6
469586	NZ_GG695917.1	Bacteroides sp. 1_1_6
469586	NZ_GG695918.1	Bacteroides sp. 1_1_6
469586	NZ_GG695919.1	Bacteroides sp. 1_1_6
469586	NZ_GG695920.1	Bacteroides sp. 1_1_6
469586	NZ_GG695921.1	Bacteroides sp. 1_1_6
469586	NZ_GG695922.1	Bacteroides sp. 1_1_6
469586	NZ_GG695923.1	Bacteroides sp. 1_1_6
469586	NZ_GG695924.1	Bacteroides sp. 1_1_6
469586	NZ_GG695925.1	Bacteroides sp. 1_1_6
469586	NZ_GG695926.1	Bacteroides sp. 1_1_6
469586	NZ_GG695927.1	Bacteroides sp. 1_1_6
469586	NZ_GG695928.1	Bacteroides sp. 1_1_6
469586	NZ_GG695929.1	Bacteroides sp. 1_1_6
469586	NZ_GG695930.1	Bacteroides sp. 1_1_6
469586	NZ_GG695931.1	Bacteroides sp. 1_1_6
469586	NZ_GG695932.1	Bacteroides sp. 1_1_6
469586	NZ_GG695933.1	Bacteroides sp. 1_1_6
469586	NZ_GG695934.1	Bacteroides sp. 1_1_6
469586	NZ_GG695935.1	Bacteroides sp. 1_1_6
469586	NZ_GG695936.1	Bacteroides sp. 1_1_6
469586	NZ_GG695937.1	Bacteroides sp. 1_1_6
469586	NZ_GG695938.1	Bacteroides sp. 1_1_6
469586	NZ_GG695939.1	Bacteroides sp. 1_1_6
469586	NZ_GG695940.1	Bacteroides sp. 1_1_6
469586	NZ_GG695941.1	Bacteroides sp. 1_1_6
469586	NZ_GG695942.1	Bacteroides sp. 1_1_6
469586	NZ_GG695943.1	Bacteroides sp. 1_1_6
469586	NZ_GG695944.1	Bacteroides sp. 1_1_6
469586	NZ_GG695945.1	Bacteroides sp. 1_1_6
469586	NZ_GG695946.1	Bacteroides sp. 1_1_6
469586	NZ_GG695947.1	Bacteroides sp. 1_1_6
469586	NZ_GG695948.1	Bacteroides sp. 1_1_6
469586	NZ_GG695949.1	Bacteroides sp. 1_1_6
469586	NZ_GG695950.1	Bacteroides sp. 1_1_6
469586	NZ_GG695951.1	Bacteroides sp. 1_1_6
469586	NZ_GG695952.1	Bacteroides sp. 1_1_6
469586	NZ_GG695953.1	Bacteroides sp. 1_1_6
469586	NZ_GG695954.1	Bacteroides sp. 1_1_6
469586	NZ_GG695955.1	Bacteroides sp. 1_1_6
469586	NZ_GG695956.1	Bacteroides sp. 1_1_6
469586	NZ_GG695957.1	Bacteroides sp. 1_1_6
469586	NZ_GG695958.1	Bacteroides sp. 1_1_6
469586	NZ_GG695959.1	Bacteroides sp. 1_1_6
469586	NZ_GG695960.1	Bacteroides sp. 1_1_6
469586	NZ_GG695961.1	Bacteroides sp. 1_1_6
469586	NZ_GG695962.1	Bacteroides sp. 1_1_6
469586	NZ_GG695963.1	Bacteroides sp. 1_1_6
469586	NZ_GG695964.1	Bacteroides sp. 1_1_6
469586	NZ_GG695965.1	Bacteroides sp. 1_1_6
469586	NZ_GG695966.1	Bacteroides sp. 1_1_6
469586	NZ_GG695967.1	Bacteroides sp. 1_1_6
469586	NZ_GG695968.1	Bacteroides sp. 1_1_6
469586	NZ_GG695969.1	Bacteroides sp. 1_1_6
469587	NZ_GG705209.1	Bacteroides sp. 2_1_16
469587	NZ_GG705210.1	Bacteroides sp. 2_1_16
469587	NZ_GG705211.1	Bacteroides sp. 2_1_16
469587	NZ_GG705212.1	Bacteroides sp. 2_1_16
469587	NZ_GG705213.1	Bacteroides sp. 2_1_16
469587	NZ_GG705214.1	Bacteroides sp. 2_1_16
469587	NZ_GG705215.1	Bacteroides sp. 2_1_16
469587	NZ_GG705216.1	Bacteroides sp. 2_1_16
469587	NZ_GG705217.1	Bacteroides sp. 2_1_16
469587	NZ_GG705218.1	Bacteroides sp. 2_1_16
469587	NZ_GG705219.1	Bacteroides sp. 2_1_16
469587	NZ_GG705220.1	Bacteroides sp. 2_1_16
469587	NZ_GG705221.1	Bacteroides sp. 2_1_16
469587	NZ_GG705222.1	Bacteroides sp. 2_1_16
469587	NZ_GG705223.1	Bacteroides sp. 2_1_16
469587	NZ_GG705224.1	Bacteroides sp. 2_1_16
469587	NZ_GG705225.1	Bacteroides sp. 2_1_16
469587	NZ_GG705226.1	Bacteroides sp. 2_1_16
469588	NZ_GG705173.1	Bacteroides sp. 2_1_22
469588	NZ_GG705174.1	Bacteroides sp. 2_1_22
469588	NZ_GG705175.1	Bacteroides sp. 2_1_22
469588	NZ_GG705176.1	Bacteroides sp. 2_1_22
469588	NZ_GG705177.1	Bacteroides sp. 2_1_22
469588	NZ_GG705178.1	Bacteroides sp. 2_1_22
469588	NZ_GG705179.1	Bacteroides sp. 2_1_22
469588	NZ_GG705180.1	Bacteroides sp. 2_1_22
469588	NZ_GG705181.1	Bacteroides sp. 2_1_22
469588	NZ_GG705182.1	Bacteroides sp. 2_1_22
469588	NZ_GG705183.1	Bacteroides sp. 2_1_22
469588	NZ_GG705184.1	Bacteroides sp. 2_1_22
469588	NZ_GG705185.1	Bacteroides sp. 2_1_22
469588	NZ_GG705186.1	Bacteroides sp. 2_1_22
469588	NZ_GG705187.1	Bacteroides sp. 2_1_22
469588	NZ_GG705188.1	Bacteroides sp. 2_1_22
469588	NZ_GG705189.1	Bacteroides sp. 2_1_22
469588	NZ_GG705190.1	Bacteroides sp. 2_1_22
469588	NZ_GG705191.1	Bacteroides sp. 2_1_22
469588	NZ_GG705192.1	Bacteroides sp. 2_1_22
469588	NZ_GG705193.1	Bacteroides sp. 2_1_22
469588	NZ_GG705194.1	Bacteroides sp. 2_1_22
469588	NZ_GG705195.1	Bacteroides sp. 2_1_22
469588	NZ_GG705196.1	Bacteroides sp. 2_1_22
469588	NZ_GG705197.1	Bacteroides sp. 2_1_22
469588	NZ_GG705198.1	Bacteroides sp. 2_1_22
469588	NZ_GG705199.1	Bacteroides sp. 2_1_22
469588	NZ_GG705200.1	Bacteroides sp. 2_1_22
469588	NZ_GG705201.1	Bacteroides sp. 2_1_22
469588	NZ_GG705202.1	Bacteroides sp. 2_1_22
469588	NZ_GG705203.1	Bacteroides sp. 2_1_22
469588	NZ_GG705204.1	Bacteroides sp. 2_1_22
469588	NZ_GG705205.1	Bacteroides sp. 2_1_22
469588	NZ_GG705206.1	Bacteroides sp. 2_1_22
469588	NZ_GG705207.1	Bacteroides sp. 2_1_22
469588	NZ_GG705208.1	Bacteroides sp. 2_1_22
469589	NZ_GG705149.1	Bacteroides sp. 2_1_33B
469589	NZ_GG705150.1	Bacteroides sp. 2_1_33B
469589	NZ_GG705151.1	Bacteroides sp. 2_1_33B
469589	NZ_GG705152.1	Bacteroides sp. 2_1_33B
469589	NZ_GG705153.1	Bacteroides sp. 2_1_33B
469589	NZ_GG705154.1	Bacteroides sp. 2_1_33B
469589	NZ_GG705155.1	Bacteroides sp. 2_1_33B
469589	NZ_GG705156.1	Bacteroides sp. 2_1_33B
469589	NZ_GG705157.1	Bacteroides sp. 2_1_33B
469589	NZ_GG705158.1	Bacteroides sp. 2_1_33B
469589	NZ_GG705159.1	Bacteroides sp. 2_1_33B
469589	NZ_GG705160.1	Bacteroides sp. 2_1_33B
469589	NZ_GG705161.1	Bacteroides sp. 2_1_33B
469589	NZ_GG705162.1	Bacteroides sp. 2_1_33B
469589	NZ_GG705163.1	Bacteroides sp. 2_1_33B
469589	NZ_GG705164.1	Bacteroides sp. 2_1_33B
469589	NZ_GG705165.1	Bacteroides sp. 2_1_33B
469589	NZ_GG705166.1	Bacteroides sp. 2_1_33B
469589	NZ_GG705167.1	Bacteroides sp. 2_1_33B
469589	NZ_GG705168.1	Bacteroides sp. 2_1_33B
469589	NZ_GG705169.1	Bacteroides sp. 2_1_33B
469589	NZ_GG705170.1	Bacteroides sp. 2_1_33B
469589	NZ_GG705171.1	Bacteroides sp. 2_1_33B
469589	NZ_GG705172.1	Bacteroides sp. 2_1_33B
457388	NZ_EQ973175.1	Bacteroides sp. 2_1_7
457388	NZ_EQ973176.1	Bacteroides sp. 2_1_7
457388	NZ_EQ973177.1	Bacteroides sp. 2_1_7
457388	NZ_EQ973178.1	Bacteroides sp. 2_1_7
457388	NZ_EQ973179.1	Bacteroides sp. 2_1_7
457388	NZ_EQ973180.1	Bacteroides sp. 2_1_7
457388	NZ_EQ973181.1	Bacteroides sp. 2_1_7
457388	NZ_EQ973182.1	Bacteroides sp. 2_1_7
457388	NZ_EQ973183.1	Bacteroides sp. 2_1_7
457388	NZ_EQ973184.1	Bacteroides sp. 2_1_7
457388	NZ_EQ973185.1	Bacteroides sp. 2_1_7
457388	NZ_EQ973186.1	Bacteroides sp. 2_1_7
457388	NZ_EQ973187.1	Bacteroides sp. 2_1_7
457388	NZ_EQ973188.1	Bacteroides sp. 2_1_7
457388	NZ_EQ973189.1	Bacteroides sp. 2_1_7
457388	NZ_EQ973190.1	Bacteroides sp. 2_1_7
457388	NZ_EQ973191.1	Bacteroides sp. 2_1_7
457388	NZ_EQ973192.1	Bacteroides sp. 2_1_7
457388	NZ_EQ973193.1	Bacteroides sp. 2_1_7
457388	NZ_EQ973194.1	Bacteroides sp. 2_1_7
457388	NZ_EQ973195.1	Bacteroides sp. 2_1_7
457388	NZ_EQ973196.1	Bacteroides sp. 2_1_7
457388	NZ_EQ973197.1	Bacteroides sp. 2_1_7
457388	NZ_EQ973198.1	Bacteroides sp. 2_1_7
457388	NZ_EQ973199.1	Bacteroides sp. 2_1_7
457388	NZ_EQ973200.1	Bacteroides sp. 2_1_7
457388	NZ_EQ973201.1	Bacteroides sp. 2_1_7
457388	NZ_EQ973202.1	Bacteroides sp. 2_1_7
457388	NZ_EQ973203.1	Bacteroides sp. 2_1_7
457388	NZ_EQ973204.1	Bacteroides sp. 2_1_7
457388	NZ_EQ973205.1	Bacteroides sp. 2_1_7
457388	NZ_EQ973206.1	Bacteroides sp. 2_1_7
457388	NZ_EQ973207.1	Bacteroides sp. 2_1_7
457388	NZ_EQ973208.1	Bacteroides sp. 2_1_7
457388	NZ_EQ973209.1	Bacteroides sp. 2_1_7
457388	NZ_EQ973210.1	Bacteroides sp. 2_1_7
457388	NZ_EQ973211.1	Bacteroides sp. 2_1_7
469590	NZ_EQ973355.1	Bacteroides sp. 2_2_4
469590	NZ_EQ973356.1	Bacteroides sp. 2_2_4
469590	NZ_EQ973357.1	Bacteroides sp. 2_2_4
469590	NZ_EQ973358.1	Bacteroides sp. 2_2_4
469590	NZ_EQ973359.1	Bacteroides sp. 2_2_4
469590	NZ_EQ973360.1	Bacteroides sp. 2_2_4
469590	NZ_EQ973361.1	Bacteroides sp. 2_2_4
469590	NZ_EQ973362.1	Bacteroides sp. 2_2_4
469590	NZ_EQ973363.1	Bacteroides sp. 2_2_4
469590	NZ_EQ973364.1	Bacteroides sp. 2_2_4
469590	NZ_EQ973365.1	Bacteroides sp. 2_2_4
469590	NZ_EQ973366.1	Bacteroides sp. 2_2_4
469590	NZ_EQ973367.1	Bacteroides sp. 2_2_4
469590	NZ_EQ973368.1	Bacteroides sp. 2_2_4
469590	NZ_EQ973369.1	Bacteroides sp. 2_2_4
469590	NZ_EQ973370.1	Bacteroides sp. 2_2_4
469590	NZ_EQ973371.1	Bacteroides sp. 2_2_4
469590	NZ_EQ973372.1	Bacteroides sp. 2_2_4
469590	NZ_EQ973373.1	Bacteroides sp. 2_2_4
469590	NZ_EQ973374.1	Bacteroides sp. 2_2_4
469590	NZ_EQ973375.1	Bacteroides sp. 2_2_4
469590	NZ_EQ973376.1	Bacteroides sp. 2_2_4
469590	NZ_EQ973377.1	Bacteroides sp. 2_2_4
469590	NZ_EQ973378.1	Bacteroides sp. 2_2_4
469590	NZ_EQ973379.1	Bacteroides sp. 2_2_4
469590	NZ_EQ973380.1	Bacteroides sp. 2_2_4
469590	NZ_EQ973381.1	Bacteroides sp. 2_2_4
469590	NZ_EQ973382.1	Bacteroides sp. 2_2_4
469590	NZ_EQ973383.1	Bacteroides sp. 2_2_4
469590	NZ_EQ973384.1	Bacteroides sp. 2_2_4
469590	NZ_EQ973385.1	Bacteroides sp. 2_2_4
469590	NZ_EQ973386.1	Bacteroides sp. 2_2_4
469590	NZ_EQ973387.1	Bacteroides sp. 2_2_4
469590	NZ_EQ973388.1	Bacteroides sp. 2_2_4
469590	NZ_EQ973389.1	Bacteroides sp. 2_2_4
469590	NZ_EQ973390.1	Bacteroides sp. 2_2_4
469590	NZ_EQ973391.1	Bacteroides sp. 2_2_4
469590	NZ_EQ973392.1	Bacteroides sp. 2_2_4
469590	NZ_EQ973393.1	Bacteroides sp. 2_2_4
469590	NZ_EQ973394.1	Bacteroides sp. 2_2_4
469590	NZ_EQ973395.1	Bacteroides sp. 2_2_4
469590	NZ_EQ973396.1	Bacteroides sp. 2_2_4
469590	NZ_EQ973397.1	Bacteroides sp. 2_2_4
469590	NZ_EQ973398.1	Bacteroides sp. 2_2_4
469590	NZ_EQ973399.1	Bacteroides sp. 2_2_4
469590	NZ_EQ973400.1	Bacteroides sp. 2_2_4
469590	NZ_EQ973401.1	Bacteroides sp. 2_2_4
469590	NZ_EQ973402.1	Bacteroides sp. 2_2_4
469590	NZ_EQ973403.1	Bacteroides sp. 2_2_4
469590	NZ_EQ973404.1	Bacteroides sp. 2_2_4
469590	NZ_EQ973405.1	Bacteroides sp. 2_2_4
469590	NZ_EQ973406.1	Bacteroides sp. 2_2_4
469590	NZ_EQ973407.1	Bacteroides sp. 2_2_4
469590	NZ_EQ973408.1	Bacteroides sp. 2_2_4
469590	NZ_EQ973409.1	Bacteroides sp. 2_2_4
469590	NZ_EQ973410.1	Bacteroides sp. 2_2_4
469590	NZ_EQ973411.1	Bacteroides sp. 2_2_4
469590	NZ_EQ973412.1	Bacteroides sp. 2_2_4
469590	NZ_EQ973413.1	Bacteroides sp. 2_2_4
469590	NZ_EQ973414.1	Bacteroides sp. 2_2_4
469590	NZ_EQ973415.1	Bacteroides sp. 2_2_4
469590	NZ_EQ973416.1	Bacteroides sp. 2_2_4
457391	NZ_GG705227.1	Bacteroides sp. 3_1_33FAA
457391	NZ_GG705228.1	Bacteroides sp. 3_1_33FAA
457391	NZ_GG705229.1	Bacteroides sp. 3_1_33FAA
457391	NZ_GG705230.1	Bacteroides sp. 3_1_33FAA
457391	NZ_GG705231.1	Bacteroides sp. 3_1_33FAA
457391	NZ_GG705232.1	Bacteroides sp. 3_1_33FAA
457391	NZ_GG705233.1	Bacteroides sp. 3_1_33FAA
457391	NZ_GG705234.1	Bacteroides sp. 3_1_33FAA
457391	NZ_GG705235.1	Bacteroides sp. 3_1_33FAA
457391	NZ_GG705236.1	Bacteroides sp. 3_1_33FAA
457391	NZ_GG705237.1	Bacteroides sp. 3_1_33FAA
457391	NZ_GG705238.1	Bacteroides sp. 3_1_33FAA
457391	NZ_GG705239.1	Bacteroides sp. 3_1_33FAA
457391	NZ_GG705240.1	Bacteroides sp. 3_1_33FAA
457391	NZ_GG705241.1	Bacteroides sp. 3_1_33FAA
457391	NZ_GG705242.1	Bacteroides sp. 3_1_33FAA
457391	NZ_GG705243.1	Bacteroides sp. 3_1_33FAA
457391	NZ_GG705244.1	Bacteroides sp. 3_1_33FAA
457391	NZ_GG705245.1	Bacteroides sp. 3_1_33FAA
457391	NZ_GG705246.1	Bacteroides sp. 3_1_33FAA
457391	NZ_GG705247.1	Bacteroides sp. 3_1_33FAA
457391	NZ_GG705248.1	Bacteroides sp. 3_1_33FAA
457391	NZ_GG705249.1	Bacteroides sp. 3_1_33FAA
457391	NZ_GG705250.1	Bacteroides sp. 3_1_33FAA
457391	NZ_GG705251.1	Bacteroides sp. 3_1_33FAA
457391	NZ_GG705252.1	Bacteroides sp. 3_1_33FAA
457391	NZ_GG705253.1	Bacteroides sp. 3_1_33FAA
457391	NZ_GG705254.1	Bacteroides sp. 3_1_33FAA
457391	NZ_GG705255.1	Bacteroides sp. 3_1_33FAA
457391	NZ_GG705256.1	Bacteroides sp. 3_1_33FAA
457391	NZ_GG705257.1	Bacteroides sp. 3_1_33FAA
457391	NZ_GG705258.1	Bacteroides sp. 3_1_33FAA
457391	NZ_GG705259.1	Bacteroides sp. 3_1_33FAA
457391	NZ_GG705260.1	Bacteroides sp. 3_1_33FAA
457391	NZ_GG705261.1	Bacteroides sp. 3_1_33FAA
457392	NZ_GG693893.1	Bacteroides sp. 3_2_5
457392	NZ_GG693894.1	Bacteroides sp. 3_2_5
457392	NZ_GG693895.1	Bacteroides sp. 3_2_5
457392	NZ_GG693896.1	Bacteroides sp. 3_2_5
457392	NZ_GG693897.1	Bacteroides sp. 3_2_5
457392	NZ_GG693898.1	Bacteroides sp. 3_2_5
457392	NZ_GG693899.1	Bacteroides sp. 3_2_5
457392	NZ_GG693900.1	Bacteroides sp. 3_2_5
457392	NZ_GG693901.1	Bacteroides sp. 3_2_5
457392	NZ_GG693902.1	Bacteroides sp. 3_2_5
457392	NZ_GG693903.1	Bacteroides sp. 3_2_5
457392	NZ_GG693904.1	Bacteroides sp. 3_2_5
457392	NZ_GG693905.1	Bacteroides sp. 3_2_5
457392	NZ_GG693906.1	Bacteroides sp. 3_2_5
457392	NZ_GG693907.1	Bacteroides sp. 3_2_5
457392	NZ_GG693908.1	Bacteroides sp. 3_2_5
457392	NZ_GG693909.1	Bacteroides sp. 3_2_5
457392	NZ_GG693910.1	Bacteroides sp. 3_2_5
457392	NZ_GG693911.1	Bacteroides sp. 3_2_5
457392	NZ_GG693912.1	Bacteroides sp. 3_2_5
457392	NZ_GG693913.1	Bacteroides sp. 3_2_5
457392	NZ_GG693914.1	Bacteroides sp. 3_2_5
457392	NZ_GG693915.1	Bacteroides sp. 3_2_5
457392	NZ_GG693916.1	Bacteroides sp. 3_2_5
457392	NZ_GG693917.1	Bacteroides sp. 3_2_5
457392	NZ_GG693918.1	Bacteroides sp. 3_2_5
457392	NZ_GG693919.1	Bacteroides sp. 3_2_5
457392	NZ_GG693920.1	Bacteroides sp. 3_2_5
457392	NZ_GG693921.1	Bacteroides sp. 3_2_5
457392	NZ_GG693922.1	Bacteroides sp. 3_2_5
457392	NZ_GG693923.1	Bacteroides sp. 3_2_5
457392	NZ_GG693924.1	Bacteroides sp. 3_2_5
457392	NZ_GG693925.1	Bacteroides sp. 3_2_5
457392	NZ_GG693926.1	Bacteroides sp. 3_2_5
457392	NZ_GG693927.1	Bacteroides sp. 3_2_5
457392	NZ_GG693928.1	Bacteroides sp. 3_2_5
457392	NZ_GG693929.1	Bacteroides sp. 3_2_5
457392	NZ_GG693930.1	Bacteroides sp. 3_2_5
457392	NZ_GG693931.1	Bacteroides sp. 3_2_5
457392	NZ_GG693932.1	Bacteroides sp. 3_2_5
457392	NZ_GG693933.1	Bacteroides sp. 3_2_5
457392	NZ_GG693934.1	Bacteroides sp. 3_2_5
457392	NZ_GG693935.1	Bacteroides sp. 3_2_5
457392	NZ_GG693936.1	Bacteroides sp. 3_2_5
457392	NZ_GG693937.1	Bacteroides sp. 3_2_5
457392	NZ_GG693938.1	Bacteroides sp. 3_2_5
[truncated: 18,768 more rows]
