# Supplementary material for: Metagenomic Exploration of Viruses throughout the Indian Ocean
Source: PLoS One. 2012 Oct 17;7(10):e42047. doi: 10.1371/journal.pone.0042047 (PMC3474794; doi:10.1371/journal.pone.0042047)
Supplement: Table S11 — Benchmarking accuracy for predicting the host taxonomy. (XLSX) [file pone.0042047.s013.xlsx]

## Sheet: Sheet1
Table S11. Benchmarking accuracy for predicting the host taxonomy. Rows correspond to settings when all prokaryotic models were used in making the predictions (Exclude = "none") and when all models for a species containing the known host were excluded from classification in order to simulate a situation where the virus infects a novel bacterial species that does not have a sequenced genome (Exclu…
A. Temperate phages with lysogenic cycle.
Exclude\Predict Host Rank	genus	family	order	class	phylum	rejected
none	0.89	0.96	0.94	0.99	0.97	0.02
species	0.85	0.9	0.9	0.97	0.95	0.05
B. All phages
Exclude\Predict Host Rank	genus	family	order	class	phylum	rejected
none	0.5	0.55	0.59	0.71	0.76	0.06
species	0.43	0.49	0.54	0.68	0.75	0.07
